# Supplementary material for: The Moderating Effect of Faculty Mentorship on Undergraduate Students’ Summer Research Outcomes
Source: Atypon-hosted journal article supplement (doi:10.1187/cbe.20-04-0081), 2020-12-01

# Supplemental Material

*CBE—Life Sciences Education*

Monarrez *et al.*

| Variable       | Label                                                                                                                                                                      | Measurement Level | Role  |
|----------------|----------------------------------------------------------------------------------------------------------------------------------------------------------------------------|-------------------|-------|
| IDNumber       | Student ID                                                                                                                                                                 | Nominal           | Input |
| RecipientEmail | Recipient Email                                                                                                                                                            | Nominal           | Input |
| AFFILIATION    | Affiliation                                                                                                                                                                | Nominal           | Input |
| Q3_3           | How did you find out about Summer Research Program (SRP) opportunity? I found out about research opportunity from: - An academic advisor                                   | Scale             | Input |
| Q3_4           | How did you find out about Summer Research Program (SRP) opportunity? I found out about research opportunity from: - An announcement (flyer, poster, email, website, etc.) | Scale             | Input |
| Q3_5           | How did you find out about Summer Research Program (SRP) opportunity? I found out about research opportunity from: - A presentation given by someone from the program      | Scale             | Input |
| Q3_6           | How did you find out about Summer Research Program (SRP) opportunity? I found out about research opportunity from: - Other (please specify)                                | Scale             | Input |
| Q3_6_TEXT      | How did you find out about Summer Research Program (SRP) opportunity? I found out about research opportunity from: - Other (please specify) - Text                         | Nominal           | Input |
| Q4_1           | What motivated you to do research? I wanted to do research to: (select all that apply) - Explore my interest in science                                                    | Scale             | Input |
| Q4_2           | What motivated you to do research? I wanted to do research to: (select all that apply) - Gain hands-on experience in research                                              | Scale             | Input |
| Q4_3           | What motivated you to do research? I wanted to do research to: (select all that apply) - Clarify which field I wanted to study                                             | Scale             | Input |
| Q4_4           | What motivated you to do research? I wanted to do research to: (select all that apply) - Clarify whether graduate school would be a good choice for me                     | Scale             | Input |
| Q4_5           | What motivated you to do research? I wanted to do research to: (select all that apply) - Clarify whether I wanted to pursue a science research career                      | Scale             | Input |

|            |                                                                                                                                                                                                                              |         |       |
|------------|------------------------------------------------------------------------------------------------------------------------------------------------------------------------------------------------------------------------------|---------|-------|
| Q4_6       | What motivated you to do research? I wanted to do research to: (select all that apply) - Have a good intellectual challenge                                                                                                  | Scale   | Input |
| Q4_7       | What motivated you to do research? I wanted to do research to: (select all that apply) - Work more closely with a particular faculty mentor                                                                                  | Scale   | Input |
| Q4_8       | What motivated you to do research? I wanted to do research to: (select all that apply) - Participate in a program with strong reputation                                                                                     | Scale   | Input |
| Q4_9       | What motivated you to do research? I wanted to do research to: (select all that apply) - Get good letters of recommendation                                                                                                  | Scale   | Input |
| Q4_10      | What motivated you to do research? I wanted to do research to: (select all that apply) - Enhance my resume                                                                                                                   | Scale   | Input |
| Q4_12      | What motivated you to do research? I wanted to do research to: (select all that apply) - Other (please specify)                                                                                                              | Scale   | Input |
| Q4_12_TEXT | What motivated you to do research? I wanted to do research to: (select all that apply) - Other (please specify) - Text                                                                                                       | Nominal | Input |
| Q5         | Who was your primary research mentor during your SRP experience? The primary research mentor is the person you worked most closely with during the SRP. - Selected Choice                                                    | Scale   | Input |
| Q5_6_TEXT  | Who was your primary research mentor during your SRP experience? The primary research mentor is the person you worked most closely with during the SRP. - Other (please specify) - Text                                      | Nominal | Input |
| Q5_TEXT    | Who was your primary research mentor during your SRP experience? The primary research mentor is t...-TEXT                                                                                                                    | Nominal | Input |
| Q6         | In your Chronus connection plan, is the primary mentor you identified above listed as your:                                                                                                                                  | Scale   | Input |
| Q7_1       | THINKING AND WORKING LIKE A SCIENTIST:<br>APPLICATION OF KNOWLEDGE TO RESEARCH WORK<br><br>How much did you GAIN in the following areas as a result of your SRP mentored research experience? - Analyzing data for patterns. | Scale   | Input |

|      |                                                                                                                                                                                                                                                                            |       |       |
|------|----------------------------------------------------------------------------------------------------------------------------------------------------------------------------------------------------------------------------------------------------------------------------|-------|-------|
| Q7_2 | <p>THINKING AND WORKING LIKE A SCIENTIST:<br/>APPLICATION OF KNOWLEDGE TO RESEARCH WORK</p> <p>How much did you GAIN in the following areas as a result of your SRP mentored research experience? - Figuring out the next step in a research project.</p>                  | Scale | Input |
| Q7_3 | <p>THINKING AND WORKING LIKE A SCIENTIST:<br/>APPLICATION OF KNOWLEDGE TO RESEARCH WORK</p> <p>How much did you GAIN in the following areas as a result of your SRP mentored research experience? - Problem-solving in general.</p>                                        | Scale | Input |
| Q7_4 | <p>THINKING AND WORKING LIKE A SCIENTIST:<br/>APPLICATION OF KNOWLEDGE TO RESEARCH WORK</p> <p>How much did you GAIN in the following areas as a result of your SRP mentored research experience? - Formulating a research question that could be answered with data.</p>  | Scale | Input |
| Q7_5 | <p>THINKING AND WORKING LIKE A SCIENTIST:<br/>APPLICATION OF KNOWLEDGE TO RESEARCH WORK</p> <p>How much did you GAIN in the following areas as a result of your SRP mentored research experience? - Identifying limitations of research methods and designs.</p>           | Scale | Input |
| Q7_6 | <p>THINKING AND WORKING LIKE A SCIENTIST:<br/>APPLICATION OF KNOWLEDGE TO RESEARCH WORK</p> <p>How much did you GAIN in the following areas as a result of your SRP mentored research experience? - Understanding the theory and concepts guiding my research project.</p> | Scale | Input |
| Q7_7 | <p>THINKING AND WORKING LIKE A SCIENTIST:<br/>APPLICATION OF KNOWLEDGE TO RESEARCH WORK</p> <p>How much did you GAIN in the following areas as a result of your SRP mentored research experience? - Understanding the connections among scientific disciplines.</p>        | Scale | Input |

|      |                                                                                                                                                                                                                                                                   |       |       |
|------|-------------------------------------------------------------------------------------------------------------------------------------------------------------------------------------------------------------------------------------------------------------------|-------|-------|
| Q7_8 | <p>THINKING AND WORKING LIKE A SCIENTIST:<br/>APPLICATION OF KNOWLEDGE TO RESEARCH WORK</p> <p>How much did you GAIN in the following areas as a result of your SRP mentored research experience? - Understanding the relevance of research to my coursework.</p> | Scale | Input |
| Q8_1 | <p>PERSONAL GAINS RELATED TO RESEARCH WORK</p> <p>How much did you GAIN in the following areas as a result of your SRP mentored research experience? - Confidence in my ability to contribute to science.</p>                                                     | Scale | Input |
| Q8_2 | <p>PERSONAL GAINS RELATED TO RESEARCH WORK</p> <p>How much did you GAIN in the following areas as a result of your SRP mentored research experience? - Comfort in discussing scientific concepts with others.</p>                                                 | Scale | Input |
| Q8_3 | <p>PERSONAL GAINS RELATED TO RESEARCH WORK</p> <p>How much did you GAIN in the following areas as a result of your SRP mentored research experience? - Confidence in my ability to do well in future science courses.</p>                                         | Scale | Input |
| Q8_4 | <p>PERSONAL GAINS RELATED TO RESEARCH WORK</p> <p>How much did you GAIN in the following areas as a result of your SRP mentored research experience? - Ability to work independently.</p>                                                                         | Scale | Input |
| Q8_5 | <p>PERSONAL GAINS RELATED TO RESEARCH WORK</p> <p>How much did you GAIN in the following areas as a result of your SRP mentored research experience? - Developing patience with the slow pace of research.</p>                                                    | Scale | Input |
| Q8_6 | <p>PERSONAL GAINS RELATED TO RESEARCH WORK</p> <p>How much did you GAIN in the following areas as a result of your SRP mentored research experience? - Understanding what everyday research work is like.</p>                                                     | Scale | Input |
| Q8_7 | <p>PERSONAL GAINS RELATED TO RESEARCH WORK</p> <p>How much did you GAIN in the following areas as a result of your SRP mentored research experience? - Taking greater care in conducting procedures in the lab or field.</p>                                      | Scale | Input |
| Q9_1 | <p>SKILLS How much did you GAIN in the following areas as a result of your SRP mentored research experience? - Writing scientific reports or papers.</p>                                                                                                          | Scale | Input |

|       |                                                                                                                                                                          |       |       |
|-------|--------------------------------------------------------------------------------------------------------------------------------------------------------------------------|-------|-------|
| Q9_2  | SKILLS How much did you GAIN in the following areas as a result of your SRP mentored research experience? - Making oral presentations.                                   | Scale | Input |
| Q9_3  | SKILLS How much did you GAIN in the following areas as a result of your SRP mentored research experience? - Defending an argument when asked research-related questions. | Scale | Input |
| Q9_4  | SKILLS How much did you GAIN in the following areas as a result of your SRP mentored research experience? - Explaining my project to people outside my field.            | Scale | Input |
| Q9_5  | SKILLS How much did you GAIN in the following areas as a result of your SRP mentored research experience? - Preparing a scientific poster.                               | Scale | Input |
| Q9_6  | SKILLS How much did you GAIN in the following areas as a result of your SRP mentored research experience? - Keeping a detailed lab notebook.                             | Scale | Input |
| Q9_7  | SKILLS How much did you GAIN in the following areas as a result of your SRP mentored research experience? - Conducting Observations in the lab or field.                 | Scale | Input |
| Q9_8  | SKILLS How much did you GAIN in the following areas as a result of your SRP mentored research experience? - Using statistics to analyze data.                            | Scale | Input |
| Q9_9  | SKILLS How much did you GAIN in the following areas as a result of your SRP mentored research experience? - Calibrating instruments needed for measurement.              | Scale | Input |
| Q9_10 | SKILLS How much did you GAIN in the following areas as a result of your SRP mentored research experience? - Working with computers.                                      | Scale | Input |
| Q9_11 | SKILLS How much did you GAIN in the following areas as a result of your SRP mentored research experience? - Understanding journal articles.                              | Scale | Input |
| Q9_12 | SKILLS How much did you GAIN in the following areas as a result of your SRP mentored research experience? - Conducting database or internet searches.                    | Scale | Input |
| Q9_13 | SKILLS How much did you GAIN in the following areas as a result of your SRP mentored research experience? - Managing my time.                                            | Scale | Input |

|       |                                                                                                                                                                                                                                                        |         |       |
|-------|--------------------------------------------------------------------------------------------------------------------------------------------------------------------------------------------------------------------------------------------------------|---------|-------|
| Q10   | Other GAINS: Did you make other GAINS from doing research that we didn't mention? If so, please briefly describe these.                                                                                                                                | Nominal | Input |
| Q11_1 | The following questions ask about your overall SRP experience and about any changes in your attitudes or behaviors as a researcher. During your research experience, HOW MUCH did you: - Engage in real-world science research?                        | Scale   | Input |
| Q11_2 | The following questions ask about your overall SRP experience and about any changes in your attitudes or behaviors as a researcher. During your research experience, HOW MUCH did you: - Feel like a scientist?                                        | Scale   | Input |
| Q11_3 | The following questions ask about your overall SRP experience and about any changes in your attitudes or behaviors as a researcher. During your research experience, HOW MUCH did you: - Think creatively about the project?                           | Scale   | Input |
| Q11_4 | The following questions ask about your overall SRP experience and about any changes in your attitudes or behaviors as a researcher. During your research experience, HOW MUCH did you: - Try out new ideas or procedures on your own?                  | Scale   | Input |
| Q11_5 | The following questions ask about your overall SRP experience and about any changes in your attitudes or behaviors as a researcher. During your research experience, HOW MUCH did you: - Feel responsible for the project?                             | Scale   | Input |
| Q11_6 | The following questions ask about your overall SRP experience and about any changes in your attitudes or behaviors as a researcher. During your research experience, HOW MUCH did you: - Work extra hours because you were excited about the research? | Scale   | Input |
| Q11_7 | The following questions ask about your overall SRP experience and about any changes in your attitudes or behaviors as a researcher. During your research experience, HOW MUCH did you: - Interact with scientists from outside your school?            | Scale   | Input |

|       |                                                                                                                                                                                                                                   |       |       |
|-------|-----------------------------------------------------------------------------------------------------------------------------------------------------------------------------------------------------------------------------------|-------|-------|
| Q11_8 | The following questions ask about your overall SRP experience and about any changes in your attitudes or behaviors as a researcher. During your research experience, HOW MUCH did you: - Feel a part of the scientific community? | Scale | Input |
| Q12_1 | These questions are about your SRP experience. Please rate the following: - My working relationship with my research mentor.                                                                                                      | Scale | Input |
| Q12_2 | These questions are about your SRP experience. Please rate the following: - My working relationship with research group/lab members.                                                                                              | Scale | Input |
| Q12_3 | These questions are about your SRP experience. Please rate the following: - The amount of time I spend doing meaningful research.                                                                                                 | Scale | Input |
| Q12_4 | These questions are about your SRP experience. Please rate the following: - The amount of time I spend with my research mentor.                                                                                                   | Scale | Input |
| Q12_5 | These questions are about your SRP experience. Please rate the following: - The advice my research mentor provides about careers or graduate school.                                                                              | Scale | Input |
| Q12_6 | These questions are about your SRP experience. Please rate the following: - The research experience overall.                                                                                                                      | Scale | Input |
| Q13_1 | As part of my SRP experience... - I presented a talk or poster to other students or faculty                                                                                                                                       | Scale | Input |
| Q13_2 | As part of my SRP experience... - I presented a talk or poster at a professional conference                                                                                                                                       | Scale | Input |
| Q13_3 | As part of my SRP experience... - I attended a conference                                                                                                                                                                         | Scale | Input |
| Q13_4 | As part of my SRP experience... - I wrote or co-wrote a paper that was published in an academic journal                                                                                                                           | Scale | Input |
| Q13_5 | As part of my SRP experience... - I wrote or co-wrote a paper that was published in an undergraduate research journal                                                                                                             | Scale | Input |
| Q13_6 | As part of my SRP experience... - I will present a talk or poster to other students and faculty                                                                                                                                   | Scale | Input |
| Q13_7 | As part of my SRP experience... - I will present a talk or poster at a professional conference                                                                                                                                    | Scale | Input |
| Q13_8 | As part of my SRP experience... - I will write or co-write a paper to be published in an academic journal                                                                                                                         | Scale | Input |



|        |                                                                                                                                                                             |       |       |
|--------|-----------------------------------------------------------------------------------------------------------------------------------------------------------------------------|-------|-------|
| Q13_9  | As part of my SRP experience... - I will write or co-write a paper that was published in an undergraduate research journal                                                  | Scale | Input |
| Q13_10 | As part of my SRP experience... - I won an award or scholarship based on my research                                                                                        | Scale | Input |
| Q14    | Using a scale ranging from 1 (definitely will not) to 5 (definitely will), to what extent do you intend to pursue a biomedical research related career?                     | Scale | Input |
| Q15_1  | Rate how much you agree with the following statements in relation to your SRP experience. - Doing research confirmed my interest in my field of study.                      | Scale | Input |
| Q15_2  | Rate how much you agree with the following statements in relation to your SRP experience. - Doing research clarified for me which field of study I want to pursue.          | Scale | Input |
| Q15_3  | Rate how much you agree with the following statements in relation to your SRP experience. - My research experience has prepared me for advanced course work or thesis work. | Scale | Input |
| Q15_4  | Rate how much you agree with the following statements in relation to your SRP experience. - My research experience has prepared me for graduate school.                     | Scale | Input |
| Q15_5  | Rate how much you agree with the following statements in relation to your SRP experience. - My research experience has prepared me for a job.                               | Scale | Input |
| Q16_1  | Compared to your intentions BEFORE your SRP experience, HOW LIKELY ARE YOU NOW to: - Enroll in a PhD program in Science, Mathematics or Engineering?                        | Scale | Input |
| Q16_2  | Compared to your intentions BEFORE your SRP experience, HOW LIKELY ARE YOU NOW to: - Enroll in a Master's program in Science, Mathematics or Engineering?                   | Scale | Input |
| Q16_3  | Compared to your intentions BEFORE your SRP experience, HOW LIKELY ARE YOU NOW to: - Enroll in a combined M.D/Ph.D program?                                                 | Scale | Input |
| Q16_4  | Compared to your intentions BEFORE your SRP experience, HOW LIKELY ARE YOU NOW to: - Enroll in medical or dental school?                                                    | Scale | Input |

|        |                                                                                                                                                                                         |         |       |
|--------|-----------------------------------------------------------------------------------------------------------------------------------------------------------------------------------------|---------|-------|
| Q16_5  | Compared to your intentions BEFORE your SRP experience, HOW LIKELY ARE YOU NOW to: - Enroll in a program to earn a different professional degree (i.e. law, veterinary medicine, etc.)? | Scale   | Input |
| Q16_6  | Compared to your intentions BEFORE your SRP experience, HOW LIKELY ARE YOU NOW to: - Pursue a certification as a teacher?                                                               | Scale   | Input |
| Q16_7  | Compared to your intentions BEFORE your SRP experience, HOW LIKELY ARE YOU NOW to: - Pursue work in a science lab?                                                                      | Scale   | Input |
| Q17    | Future career plans: How did your SRP experience influence your thinking about future career and graduate school plans? Please Explain.                                                 | Nominal | Input |
| Q18_1  | How satisfied are you with the following aspects of the SRP program? - The application process.                                                                                         | Scale   | Input |
| Q18_2  | How satisfied are you with the following aspects of the SRP program? - Information available to help me choose a research project.                                                      | Scale   | Input |
| Q18_3  | How satisfied are you with the following aspects of the SRP program? - Ease in locating a research mentor.                                                                              | Scale   | Input |
| Q18_5  | How satisfied are you with the following aspects of the SRP program? - Lab or field equipment.                                                                                          | Scale   | Input |
| Q18_6  | How satisfied are you with the following aspects of the SRP program? - Support and guidance from the BUILDing SCHOLARS program staff.                                                   | Scale   | Input |
| Q18_7  | How satisfied are you with the following aspects of the SRP program? - Support and guidance from my research mentor.                                                                    | Scale   | Input |
| Q18_8  | How satisfied are you with the following aspects of the SRP program? - Support and guidance from other research group members.                                                          | Scale   | Input |
| Q18_9  | How satisfied are you with the following aspects of the SRP program? - Research group meetings.                                                                                         | Scale   | Input |
| Q18_12 | How satisfied are you with the following aspects of the SRP program? - Group social activities.                                                                                         | Scale   | Input |
| Q18_13 | How satisfied are you with the following aspects of the SRP program? - Professional development activities (e.g. workshops, seminars, etc.)                                             | Scale   | Input |

|         |                                                                                                                                                                                                      |       |       |
|---------|------------------------------------------------------------------------------------------------------------------------------------------------------------------------------------------------------|-------|-------|
| Q19     | Were you required to get Institutional Review Board (IRB) certification to conduct research?                                                                                                         | Scale | Input |
| Q20     | Academic year research: How many times (in semesters) have you participated in ACADEMIC YEAR research prior to participating in the SRP program?                                                     | Scale | Input |
| Q21     | Summer research: How many times have you participated in SUMMER research prior to participating in the SRP program?                                                                                  | Scale | Input |
| Q22     | Research activities. How many hours per week did you work at research-related activities in your SRP experience?                                                                                     | Scale | Input |
| Q23     | Hours with mentor: On average, how many hours per week did you spend talking with your SRP primary research mentor?                                                                                  | Scale | Input |
| Q24     | Were you a "visiting researcher" -- doing research away from your home institution?                                                                                                                  | Scale | Input |
| Q25_1_1 | Please indicate the importance to you personally before and after the SRP experience for each of... - Before the SRP - Obtaining recognition from my colleagues/peers for contributions to my field. | Scale | Input |
| Q25_1_2 | Please indicate the importance to you personally before and after the SRP experience for each of... - Before the SRP - Becoming an authority in my field.                                            | Scale | Input |
| Q25_1_3 | Please indicate the importance to you personally before and after the SRP experience for each of... - Before the SRP - Making a theoretical contribution to science.                                 | Scale | Input |
| Q25_2_1 | Please indicate the importance to you personally before and after the SRP experience for each of... - After the SRP - Obtaining recognition from my colleagues/peers for contributions to my field.  | Scale | Input |
| Q25_2_2 | Please indicate the importance to you personally before and after the SRP experience for each of... - After the SRP - Becoming an authority in my field.                                             | Scale | Input |
| Q25_2_3 | Please indicate the importance to you personally before and after the SRP experience for each of... - After the SRP - Making a theoretical contribution to science.                                  | Scale | Input |

|         |                                                                                                                                                                                                                       |       |       |
|---------|-----------------------------------------------------------------------------------------------------------------------------------------------------------------------------------------------------------------------|-------|-------|
| Q26_1_1 | To what extent were/are (before and after the SRP experience) the following statements true of yo... - Before the SRP - I have a strong sense of belonging to the community of scientists.                            | Scale | Input |
| Q26_1_2 | To what extent were/are (before and after the SRP experience) the following statements true of yo... - Before the SRP - I derive great personal satisfaction from working on a team that is doing important research. | Scale | Input |
| Q26_1_3 | To what extent were/are (before and after the SRP experience) the following statements true of yo... - Before the SRP - I have come to think of myself as a 'scientist.'                                              | Scale | Input |
| Q26_1_4 | To what extent were/are (before and after the SRP experience) the following statements true of yo... - Before the SRP - I feel like I belong in the field of science.                                                 | Scale | Input |
| Q26_2_1 | To what extent were/are (before and after the SRP experience) the following statements true of yo... - After the SRP - I have a strong sense of belonging to the community of scientists.                             | Scale | Input |
| Q26_2_2 | To what extent were/are (before and after the SRP experience) the following statements true of yo... - After the SRP - I derive great personal satisfaction from working on a team that is doing important research.  | Scale | Input |
| Q26_2_3 | To what extent were/are (before and after the SRP experience) the following statements true of yo... - After the SRP - I have come to think of myself as a 'scientist.'                                               | Scale | Input |
| Q26_2_4 | To what extent were/are (before and after the SRP experience) the following statements true of yo... - After the SRP - I feel like I belong in the field of science.                                                  | Scale | Input |
| Q27_1_1 | Indicate to what extent you were/are (before and after the SRP experience) confident that you can... - Before the SRP - Use technical science skills (use of tools, instruments, and/or techniques)                   | Scale | Input |
| Q27_1_2 | Indicate to what extent you were/are (before and after the SRP experience) confident that you can... - Before the SRP - Generate a research question to answer                                                        | Scale | Input |
| Q27_1_3 | Indicate to what extent you were/are (before and after the SRP experience) confident that you can... - Before the SRP - Figure out what data/observations to collect and how to collect them                          | Scale | Input |

|          |                                                                                                                                                                                                    |       |       |
|----------|----------------------------------------------------------------------------------------------------------------------------------------------------------------------------------------------------|-------|-------|
| Q27_1_4  | Indicate to what extent you were/are (before and after the SRP experience) confident that you can... - Before the SRP - Create explanations for the results of the study                           | Scale | Input |
| Q27_1_5  | Indicate to what extent you were/are (before and after the SRP experience) confident that you can... - Before the SRP - Use scientific literature and/or reports to guide research                 | Scale | Input |
| Q27_1_6  | Indicate to what extent you were/are (before and after the SRP experience) confident that you can... - Before the SRP - Develop theories (integrate and coordinate results from multiple studies)  | Scale | Input |
| Q27_1_7  | Indicate to what extent you were/are (before and after the SRP experience) confident that you can... - Before the SRP - Ask relevant questions                                                     | Scale | Input |
| Q27_1_8  | Indicate to what extent you were/are (before and after the SRP experience) confident that you can... - Before the SRP - Identify what is known and not known in a problem                          | Scale | Input |
| Q27_1_9  | Indicate to what extent you were/are (before and after the SRP experience) confident that you can... - Before the SRP - Understand scientific concepts                                             | Scale | Input |
| Q27_1_10 | Indicate to what extent you were/are (before and after the SRP experience) confident that you can... - Before the SRP - See connections between different areas of science and mathematic          | Scale | Input |
| Q27_2_1  | Indicate to what extent you were/are (before and after the SRP experience) confident that you can... - After the SRP - Use technical science skills (use of tools, instruments, and/or techniques) | Scale | Input |
| Q27_2_2  | Indicate to what extent you were/are (before and after the SRP experience) confident that you can... - After the SRP - Generate a research question to answer                                      | Scale | Input |
| Q27_2_3  | Indicate to what extent you were/are (before and after the SRP experience) confident that you can... - After the SRP - Figure out what data/observations to collect and how to collect them        | Scale | Input |
| Q27_2_4  | Indicate to what extent you were/are (before and after the SRP experience) confident that you can... - After the SRP - Create explanations for the results of the study                            | Scale | Input |

|          |                                                                                                                                                                                                     |       |       |
|----------|-----------------------------------------------------------------------------------------------------------------------------------------------------------------------------------------------------|-------|-------|
| Q27_2_5  | Indicate to what extent you were/are (before and after the SRP experience) confident that you can... - After the SRP<br>- Use scientific literature and/or reports to guide research                | Scale | Input |
| Q27_2_6  | Indicate to what extent you were/are (before and after the SRP experience) confident that you can... - After the SRP<br>- Develop theories (integrate and coordinate results from multiple studies) | Scale | Input |
| Q27_2_7  | Indicate to what extent you were/are (before and after the SRP experience) confident that you can... - After the SRP<br>- Ask relevant questions                                                    | Scale | Input |
| Q27_2_8  | Indicate to what extent you were/are (before and after the SRP experience) confident that you can... - After the SRP<br>- Identify what is known and not known in a problem                         | Scale | Input |
| Q27_2_9  | Indicate to what extent you were/are (before and after the SRP experience) confident that you can... - After the SRP<br>- Understand scientific concepts                                            | Scale | Input |
| Q27_2_10 | Indicate to what extent you were/are (before and after the SRP experience) confident that you can... - After the SRP<br>- See connections between different areas of science and mathematic         | Scale | Input |
| Q28_1_1  | How likely were/are (before and after the SRP experience) you to consider pursuing a biomedical r... -<br>Before the SRP - Likelihood of pursuing a biomedical research career                      | Scale | Input |
| Q28_2_1  | How likely were/are (before and after the SRP experience) you to consider pursuing a biomedical r... -<br>After the SRP - Likelihood of pursuing a biomedical research career                       | Scale | Input |
| Q29_1    | How much like you is each of the following statements?<br>Be honest - there are no right or wrong answers. - I have overcome setbacks to conquer an important challenge                             | Scale | Input |
| Q29_2    | How much like you is each of the following statements?<br>Be honest - there are no right or wrong answers. - New ideas and projects sometimes distract me from previous ones                        | Scale | Input |
| Q29_3    | How much like you is each of the following statements?<br>Be honest - there are no right or wrong answers. - My interests change from year to year                                                  | Scale | Input |

|        |                                                                                                                                                                                                                    |       |       |
|--------|--------------------------------------------------------------------------------------------------------------------------------------------------------------------------------------------------------------------|-------|-------|
| Q29_4  | How much like you is each of the following statements?<br>Be honest - there are no right or wrong answers. -<br>Setbacks don't discourage me                                                                       | Scale | Input |
| Q29_5  | How much like you is each of the following statements?<br>Be honest - there are no right or wrong answers. - I have<br>been obsessed with a certain idea or project for a short<br>time but later lost interest    | Scale | Input |
| Q29_6  | How much like you is each of the following statements?<br>Be honest - there are no right or wrong answers. - I am a<br>hard worker                                                                                 | Scale | Input |
| Q29_7  | How much like you is each of the following statements?<br>Be honest - there are no right or wrong answers. - I often<br>set a goal but later choose to pursue a different one                                      | Scale | Input |
| Q29_8  | How much like you is each of the following statements?<br>Be honest - there are no right or wrong answers. - I have<br>difficulty maintaining my focus on projects that take more<br>than a few months to complete | Scale | Input |
| Q29_9  | How much like you is each of the following statements?<br>Be honest - there are no right or wrong answers. - I finish<br>whatever I begin                                                                          | Scale | Input |
| Q29_10 | How much like you is each of the following statements?<br>Be honest - there are no right or wrong answers. - I have<br>achieved a goal that took years of work                                                     | Scale | Input |
| Q29_11 | How much like you is each of the following statements?<br>Be honest - there are no right or wrong answers. - I<br>become interested in new pursuits every few months                                               | Scale | Input |
| Q29_12 | How much like you is each of the following statements?<br>Be honest - there are no right or wrong answers. - I am<br>diligent                                                                                      | Scale | Input |
| Q30_1  | Based on the feedback about your performance from your<br>primary mentor during your SRP experience, how well did<br>you: - Independently conduct experiments or a research<br>project                             | Scale | Input |
| Q30_2  | Based on the feedback about your performance from your<br>primary mentor during your SRP experience, how well did<br>you: - Analyze research data                                                                  | Scale | Input |
| Q30_3  | Based on the feedback about your performance from your<br>primary mentor during your SRP experience, how well did<br>you: - Write a scientific report                                                              | Scale | Input |

|       |                                                                                                                                                                                           |       |       |
|-------|-------------------------------------------------------------------------------------------------------------------------------------------------------------------------------------------|-------|-------|
| Q30_4 | Based on the feedback about your performance from your primary mentor during your SRP experience, how well did you: - Prepare a scientific poster or presentation                         | Scale | Input |
| Q31_1 | Please indicate your level of agreement or disagreement with the following statements:- My research mentor showed me how to conduct a research procedure.                                 | Scale | Input |
| Q31_2 | Please indicate your level of agreement or disagreement with the following statements: - I look up to my research mentor as a career role model                                           | Scale | Input |
| Q31_3 | Please indicate your level of agreement or disagreement with the following statements: - My research mentor encouraged me to pursue a research science career                             | Scale | Input |
| Q31_4 | Please indicate your level of agreement or disagreement with the following statements: - My research mentor told me that I have the ability to be a scientist                             | Scale | Input |
| Q31_5 | Please indicate your level of agreement or disagreement with the following statements: - I felt nervous when conducting research                                                          | Scale | Input |
| Q31_6 | Please indicate your level of agreement or disagreement with the following statements: - I felt anxious about my ability to do research                                                   | Scale | Input |
| Q32_1 | Based on your most recent research experience, please use the scale below and indicate how much confidence you have in your ability to: - Make important contributions to a research team | Scale | Input |
| Q32_2 | Based on your most recent research experience, please use the scale below and indicate how much confidence you have in your ability to: - Explain my research topic to other scientists   | Scale | Input |
| Q32_3 | Based on your most recent research experience, please use the scale below and indicate how much confidence you have in your ability to: - Pursue a research science career                | Scale | Input |
| Q32_4 | Based on your most recent research experience, please use the scale below and indicate how much confidence you have in your ability to: - Do research                                     | Scale | Input |
| Q32_5 | Based on your most recent research experience, please use the scale below and indicate how much confidence you have in your ability to: - Write a basic proposal                          | Scale | Input |



|        |                                                                                                                                                                                                                             |       |       |
|--------|-----------------------------------------------------------------------------------------------------------------------------------------------------------------------------------------------------------------------------|-------|-------|
| Q32_6  | Based on your most recent research experience, please use the scale below and indicate how much confidence you have in your ability to: - Present a research talk or poster                                                 | Scale | Input |
| Q32_7  | Based on your most recent research experience, please use the scale below and indicate how much confidence you have in your ability to: - Excel in my science major over the next two semesters                             | Scale | Input |
| Q32_8  | Based on your most recent research experience, please use the scale below and indicate how much confidence you have in your ability to: - Complete a science degree                                                         | Scale | Input |
| Q32_9  | Based on your most recent research experience, please use the scale below and indicate how much confidence you have in your ability to: - Persist with science courses even though I may be considered a 'minority' in them | Scale | Input |
| Q32_10 | Based on your most recent research experience, please use the scale below and indicate how much confidence you have in your ability to: - Pursue a graduate degree in science                                               | Scale | Input |
| Q33_1  | Please use the following scale to indicate your level of agreement with each statement beginning with: A research science career would allow me to: - Do work that makes a difference in peoples lives or to society        | Scale | Input |
| Q33_2  | Please use the following scale to indicate your level of agreement with each statement beginning with: A research science career would allow me to: - Do work that I find satisfying                                        | Scale | Input |
| Q33_3  | Please use the following scale to indicate your level of agreement with each statement beginning with: A research science career would allow me to: - Go into a field with high employment demand                           | Scale | Input |
| Q33_4  | Please use the following scale to indicate your level of agreement with each statement beginning with: A research science career would allow me to: - Get respect from other people                                         | Scale | Input |
| Q33_5  | Please use the following scale to indicate your level of agreement with each statement beginning with: A research science career would allow me to: - Earn an attractive salary                                             | Scale | Input |

|       |                                                                                                                                                             |       |       |
|-------|-------------------------------------------------------------------------------------------------------------------------------------------------------------|-------|-------|
| Q34_1 | In your mentoring relationship, how important is it that your primary research mentor: - Is willing to discuss diversity                                    | Scale | Input |
| Q34_2 | In your mentoring relationship, how important is it that your primary research mentor: - Considers their own cultural background, as well as yours          | Scale | Input |
| Q34_3 | In your mentoring relationship, how important is it that your primary research mentor: - Values and respects cultural differences                           | Scale | Input |
| Q35_1 | In your mentoring relationship, how skilled is your primary research mentor in: - Discussing diversity                                                      | Scale | Input |
| Q35_2 | In your mentoring relationship, how skilled is your primary research mentor in: - Considering their own cultural background, as well as yours               | Scale | Input |
| Q35_3 | In your mentoring relationship, how skilled is your primary research mentor in: - Valuing and respecting cultural differences                               | Scale | Input |
| Q36_1 | Please rate how skilled you feel your primary mentor was in the following areas: - Active listening                                                         | Scale | Input |
| Q36_2 | Please rate how skilled you feel your primary mentor was in the following areas: - Providing constructive feedback                                          | Scale | Input |
| Q36_3 | Please rate how skilled you feel your primary mentor was in the following areas: - Establishing a relationship based on trust                               | Scale | Input |
| Q36_4 | Please rate how skilled you feel your primary mentor was in the following areas: - Identifying and accommodating different communication styles             | Scale | Input |
| Q36_5 | Please rate how skilled you feel your primary mentor was in the following areas: - Employing strategies to improve communication with mentees               | Scale | Input |
| Q36_6 | Please rate how skilled you feel your primary mentor was in the following areas: - Coordinating effectively with your other mentors                         | Scale | Input |
| Q36_7 | Please rate how skilled you feel your primary mentor was in the following areas: - Working with you to set clear expectations of the mentoring relationship | Scale | Input |
| Q36_8 | Please rate how skilled you feel your primary mentor was in the following areas: - Aligning his/her expectations with yours                                 | Scale | Input |

|        |                                                                                                                                                                                                                                                             |       |       |
|--------|-------------------------------------------------------------------------------------------------------------------------------------------------------------------------------------------------------------------------------------------------------------|-------|-------|
| Q36_9  | Please rate how skilled you feel your primary mentor was in the following areas: - Considering how personal and professional differences may impact expectations                                                                                            | Scale | Input |
| Q36_10 | Please rate how skilled you feel your primary mentor was in the following areas: - Working with you to set research goals                                                                                                                                   | Scale | Input |
| Q36_11 | Please rate how skilled you feel your primary mentor was in the following areas: - Helping you develop strategies to meet goals                                                                                                                             | Scale | Input |
| Q36_12 | Please rate how skilled you feel your primary mentor was in the following areas: - Accurately estimating your level of scientific knowledge                                                                                                                 | Scale | Input |
| Q36_13 | Please rate how skilled you feel your primary mentor was in the following areas: - Accurately estimating your ability to conduct research                                                                                                                   | Scale | Input |
| Q36_26 | Please rate how skilled you feel your primary mentor was in the following areas: - Employing strategies to enhance your knowledge and abilities                                                                                                             | Scale | Input |
| Q36_14 | Please rate how skilled you feel your primary mentor was in the following areas: - Motivating you                                                                                                                                                           | Scale | Input |
| Q36_15 | Please rate how skilled you feel your primary mentor was in the following areas: - Building your confidence                                                                                                                                                 | Scale | Input |
| Q36_16 | Please rate how skilled you feel your primary mentor was in the following areas: - Stimulating your creativity                                                                                                                                              | Scale | Input |
| Q36_17 | Please rate how skilled you feel your primary mentor was in the following areas: - Acknowledging your professional contributions                                                                                                                            | Scale | Input |
| Q36_18 | Please rate how skilled you feel your primary mentor was in the following areas: - Negotiating a path to professional independence with you                                                                                                                 | Scale | Input |
| Q36_19 | Please rate how skilled you feel your primary mentor was in the following areas: - Taking into account the biases and prejudice you bring to the mentor/mentee relationship                                                                                 | Scale | Input |
| Q36_20 | Please rate how skilled you feel your primary mentor was in the following areas: - Working effectively with mentees whose personal background is different from his/her own (age, race, gender, class, religion, culture, region, family composition, etc.) | Scale | Input |

|        |                                                                                                                                                                   |       |       |
|--------|-------------------------------------------------------------------------------------------------------------------------------------------------------------------|-------|-------|
| Q36_21 | Please rate how skilled you feel your primary mentor was in the following areas: - Helping you network effectively                                                | Scale | Input |
| Q36_22 | Please rate how skilled you feel your primary mentor was in the following areas: - Helping you set career goals                                                   | Scale | Input |
| Q36_23 | Please rate how skilled you feel your primary mentor was in the following areas: - Helping you balance work with your personal life                               | Scale | Input |
| Q36_24 | Please rate how skilled you feel your primary mentor was in the following areas: - Understanding his/her impact as a role model                                   | Scale | Input |
| Q36_25 | Please rate how skilled you feel your primary mentor was in the following areas: - Helping you acquire resources (e.g. other funding, support, etc.)              | Scale | Input |
| Q37_1  | Please respond to the following statements regarding your primary mentor: - My mentor gave me an overview of how my research fit into an overall research project | Scale | Input |
| Q37_2  | Please respond to the following statements regarding your primary mentor: - My mentor helped me develop my research skills                                        | Scale | Input |
| Q37_3  | Please respond to the following statements regarding your primary mentor: - My mentor showed interest in my research project                                      | Scale | Input |
| Q37_4  | Please respond to the following statements regarding your primary mentor: - My mentor was available to me when I had problems or questions about my research      | Scale | Input |
| Q37_5  | Please respond to the following statements regarding your primary mentor: - My mentor offered constructive feedback when necessary                                | Scale | Input |
| Q37_6  | Please respond to the following statements regarding your primary mentor: - My mentor and I developed a relationship based on trust                               | Scale | Input |
| Q37_7  | Please respond to the following statements regarding your primary mentor: - My mentor understood how I learn best                                                 | Scale | Input |
| Q37_8  | Please respond to the following statements regarding your primary mentor: - My mentor created an environment that allowed me to achieve my goals                  | Scale | Input |

|        |                                                                                                                                             |       |       |
|--------|---------------------------------------------------------------------------------------------------------------------------------------------|-------|-------|
| Q37_9  | Please respond to the following statements regarding your primary mentor: - My mentor seemed so busy that I was afraid to interrupt him/her | Scale | Input |
| Q37_10 | Please respond to the following statements regarding your primary mentor: - My mentor had an effective mentoring style                      | Scale | Input |
| Q37_11 | Please respond to the following statements regarding your primary mentor: - My mentor acted as a positive role model                        | Scale | Input |
| Q37_12 | Please respond to the following statements regarding your primary mentor: - My mentor showed interest in me as a person                     | Scale | Input |
| Q37_13 | Please respond to the following statements regarding your primary mentor: - My mentor fostered independence                                 | Scale | Input |
| Q37_14 | Please respond to the following statements regarding your primary mentor: - My mentored fostered confidence in my skills                    | Scale | Input |
| Q37_15 | Please respond to the following statements regarding your primary mentor: - My mentor appreciated my contributions                          | Scale | Input |
| Q37_16 | Please respond to the following statements regarding your primary mentor: - My mentor encouraged me to be creative                          | Scale | Input |
| Q37_17 | Please respond to the following statements regarding your primary mentor: - My mentor made me enthusiastic about my project                 | Scale | Input |
| Q37_18 | Please respond to the following statements regarding your primary mentor: - My mentor helped me feel curious about my project               | Scale | Input |
| Q37_19 | Please respond to the following statements regarding your primary mentor: - My mentor treated me as a colleague                             | Scale | Input |
| Q37_20 | Please respond to the following statements regarding your primary mentor: - My mentor helped me decide on a career path                     | Scale | Input |
| Q37_21 | Please respond to the following statements regarding your primary mentor: - My mentor communicated his/her expectations of me               | Scale | Input |

|        |                                                                                                                                                                                                                                      |       |       |
|--------|--------------------------------------------------------------------------------------------------------------------------------------------------------------------------------------------------------------------------------------|-------|-------|
| Q37_22 | Please respond to the following statements regarding your primary mentor: - My mentor respected my goals                                                                                                                             | Scale | Input |
| Q37_23 | Please respond to the following statements regarding your primary mentor: - My mentor allowed me to take ownership in my research                                                                                                    | Scale | Input |
| Q37_24 | Please respond to the following statements regarding your primary mentor: - My mentor created an environment where I felt safe to make mistakes                                                                                      | Scale | Input |
| Q37_25 | Please respond to the following statements regarding your primary mentor: - My mentor made me feel included in the lab                                                                                                               | Scale | Input |
| Q37_26 | Please respond to the following statements regarding your primary mentor: - My mentor regularly assessed skills and knowledge that I gained in the lab                                                                               | Scale | Input |
| Q38    | Were you matched with your mentor using Chronus? (If yes, this means that you did not know the person beforehand but s/he was identified as a good match for you by the program administrators based on the Chronus profile system.) | Scale | Input |
| Q39    | How would you rate the match made by Chronus? Please rate from 1 (Very poor) to 5 (Excellent).                                                                                                                                       | Scale | Input |
| Q40    | Did you use the Chronus system, including viewing your mentor's/mentee's profile (e.g., field, research interests, CV), before your first contact?                                                                                   | Scale | Input |
| Q41    | Indicate your level of satisfaction or dissatisfaction with your mentor/mentee relationship. Please rate from 1 (Strongly dissatisfied) to 5 (Strongly satisfied).                                                                   | Scale | Input |
| Q42_1  | Please provide your level of disagreement or agreement with each of the statements below in relation to the Chronus on-line system used to manage the BUILDing SCHOLARS mentoring program. - It is user friendly                     | Scale | Input |
| Q42_2  | Please provide your level of disagreement or agreement with each of the statements below in relation to the Chronus on-line system used to manage the BUILDing SCHOLARS mentoring program. - I easily remember how to use it         | Scale | Input |

|         |                                                                                                                                                                                                                                                                       |         |       |
|---------|-----------------------------------------------------------------------------------------------------------------------------------------------------------------------------------------------------------------------------------------------------------------------|---------|-------|
| Q42_3   | Please provide your level of disagreement or agreement with each of the statements below in relation to the Chronus on-line system used to manage the BUILDing SCHOLARS mentoring program. - I am satisfied with it                                                   | Scale   | Input |
| Q42_4   | Please provide your level of disagreement or agreement with each of the statements below in relation to the Chronus on-line system used to manage the BUILDing SCHOLARS mentoring program. - It works the way I want it to work                                       | Scale   | Input |
| Q42_5   | Please provide your level of disagreement or agreement with each of the statements below in relation to the Chronus on-line system used to manage the BUILDing SCHOLARS mentoring program. - The mentoring content I receive via emails sent from the Chronus syF8000 | Scale   | Input |
| Q42_6   | Please provide your level of disagreement or agreement with each of the statements below in relation to the Chronus on-line system used to manage the BUILDing SCHOLARS mentoring program. - The profile form is quick and easy to complete                           | Scale   | Input |
| Q43     | What is the most negative aspect of the Chronus system?                                                                                                                                                                                                               | Nominal | Input |
| Q44     | What is the most positive aspect of the Chronus system?                                                                                                                                                                                                               | Nominal | Input |
| Q45     | Did your SRP experience take place at UTEP or at a Partner institution?                                                                                                                                                                                               | Scale   | Input |
| Q46_1_1 | Please rate the following sessions of the Mentee Training Workshop Series you attended during the... - Session Ratings - Introductions and Expectations                                                                                                               | Scale   | Input |
| Q46_1_2 | Please rate the following sessions of the Mentee Training Workshop Series you attended during the... - Session Ratings - Professionalism                                                                                                                              | Scale   | Input |
| Q46_1_3 | Please rate the following sessions of the Mentee Training Workshop Series you attended during the... - Session Ratings - Science Identity (showing the discussion of Hidden Figures)                                                                                  | Scale   | Input |
| Q46_1_4 | Please rate the following sessions of the Mentee Training Workshop Series you attended during the... - Session Ratings - Time Management and Self-care                                                                                                                | Scale   | Input |
| Q69_1   | Click to write the question text - Ophra Leyser-Wheylan (on 6/13), Sociology and Qualitative Research                                                                                                                                                                 | Scale   | Input |

|            |                                                                                                                                                                     |         |       |
|------------|---------------------------------------------------------------------------------------------------------------------------------------------------------------------|---------|-------|
| Q69_2      | Click to write the question text - Irasema Coronado (on 6/20), Environmental Science and Research Impact on Public Policy                                           | Scale   | Input |
| Q69_3      | Click to write the question text - Ricardo Bernal (on 7/11), Biochemistry and Molecular Structure Research                                                          | Scale   | Input |
| Q69_4      | Click to write the question text - Denise Pinal (on 8/1), Pharmacy                                                                                                  | Scale   | Input |
| Q47        | Please rate the usefulness of the feedback you received on your poster during the poster practice session that took place the last day of your UTEP SRP experience. | Scale   | Input |
| Q48        | What would have made your SRP experience better?                                                                                                                    | Nominal | Input |
| Q49        | What would improve the BUILDing SCHOLARS Summer Research Program, overall?                                                                                          | Nominal | Input |
| Q51        | What is your date of birth (MM/DD/YYYY)?                                                                                                                            | Nominal | Input |
| Q52        | What is your gender? - Selected Choice                                                                                                                              | Scale   | Input |
| Q52_3_TEXT | What is your gender? - Your choice label here... - Text                                                                                                             | Nominal | Input |
| Q53        | What is your race? Choose the one that you more closely associate with. - Selected Choice                                                                           | Scale   | Input |
| Q53_6_TEXT | What is your race? Choose the one that you more closely associate with. - Other (please specify) - Text                                                             | Nominal | Input |
| Q54        | Are you Hispanic or Latino/Latina?                                                                                                                                  | Scale   | Input |
| Q55_1      | What year are you in college? - I am a:                                                                                                                             | Scale   | Input |
| Q57        | Please indicate who your parent "1" is below. - Selected Choice                                                                                                     | Scale   | Input |
| Q57_3_TEXT | Please indicate who your parent "1" is below. - Other guardian (please specify) - Text                                                                              | Nominal | Input |
| Q58        | What is the highest degree or level of school your parent "1" completed?                                                                                            | Scale   | Input |
| Q59        | What was your parent's "1" career at the time you were 18 years of age? Please use one of the career codes listed in the table below.                               | Nominal | Input |
| Q61        | Please indicate who your parent "2" is below. - Selected Choice                                                                                                     | Scale   | Input |
| Q61_3_TEXT | Please indicate who your parent "2" is below. - Other guardian (please specify) - Text                                                                              | Nominal | Input |
| Q62        | What is the highest degree or level of school your parent "2" completed?                                                                                            | Scale   | Input |



|                           |                                                                                                                                                                                            |         |       |
|---------------------------|--------------------------------------------------------------------------------------------------------------------------------------------------------------------------------------------|---------|-------|
| Q63                       | What was your parent's "2" career at the time you were 18 years of age? Please use one of the career codes listed in the table below.                                                      | Nominal | Input |
| Q66                       | On average, how many people lived in your household when you were a child? (Please provide an average if your household was comprised of varying numbers of members across your childhood) | Nominal | Input |
| Q67                       | On average, how many bedrooms did your home have when you were a child? (Please provide an average if your family resided in multiple homes across your childhood)                         | Nominal | Input |
| Q68                       | Were you born in the U.S.?                                                                                                                                                                 | Scale   | Input |
| Think_Work_Scientist_COMP | Mean of items related to thinking and working like a scientist                                                                                                                             | Scale   | Input |
| Research_Skills_COMP      | Mean of items related to research skills                                                                                                                                                   | Scale   | Input |
| Attitudes_COMP            | Mean of items related to attitudes and behaviors as a scientist                                                                                                                            | Scale   | Input |
| Personal_Gains_COMP       | Mean of items related to personal gains related to research                                                                                                                                | Scale   | Input |
| PRE_science_identity      | Mean of items related to science identity (PRE)                                                                                                                                            | Scale   | Input |
| POST_science_identity     | Mean of items related to science identity (POST)                                                                                                                                           | Scale   | Input |
| Pre_science_SE            | Mean of items related to science self-efficacy (PRE)                                                                                                                                       | Scale   | Input |
| Post_science_SE           | Mean of items related to science self-efficacy (POST)                                                                                                                                      | Scale   | Input |
| MCA                       | Mean of items related to mentors competency as perceived by mentees                                                                                                                        | Scale   | Input |
| Research_SE_COMP          | Research self-efficacy                                                                                                                                                                     | Scale   | Input |
| Satisfaction              | Satisfaction with mentor/research experience (Q12_1 to 12_6)                                                                                                                               | Scale   | Input |

| Variable Values |      |              |
|-----------------|------|--------------|
| Value           |      | Label        |
| AFFILIATION     | 1.00 | BUILD Fellow |

|       |      |                                                                  |
|-------|------|------------------------------------------------------------------|
|       | 2.00 | Pipeline Partner                                                 |
|       | 3.00 | UTEP non-BUILD                                                   |
| Q3_3  | 1    | Yes                                                              |
|       | 2    | No                                                               |
| Q3_4  | 1    | Yes                                                              |
|       | 2    | No                                                               |
| Q3_5  | 1    | Yes                                                              |
|       | 2    | No                                                               |
| Q3_6  | 1    | Yes                                                              |
|       | 2    | No                                                               |
| Q4_1  | 1    | Yes                                                              |
|       | 2    | No                                                               |
| Q4_2  | 1    | Yes                                                              |
|       | 2    | No                                                               |
| Q4_3  | 1    | Yes                                                              |
|       | 2    | No                                                               |
| Q4_4  | 1    | Yes                                                              |
|       | 2    | No                                                               |
| Q4_5  | 1    | Yes                                                              |
|       | 2    | No                                                               |
| Q4_6  | 1    | Yes                                                              |
|       | 2    | No                                                               |
| Q4_7  | 1    | Yes                                                              |
|       | 2    | No                                                               |
| Q4_8  | 1    | Yes                                                              |
|       | 2    | No                                                               |
| Q4_9  | 1    | Yes                                                              |
|       | 2    | No                                                               |
| Q4_10 | 1    | Yes                                                              |
|       | 2    | No                                                               |
| Q4_12 | 1    | Yes                                                              |
|       | 2    | No                                                               |
| Q5    | 1    | The faculty member of record                                     |
|       | 2    | A post-doc in the faculty's lab or on his/her team               |
|       | 3    | A graduate student in the faculty's lab or on his/her team       |
|       | 4    | An undergraduate student in the faculty's lab or on his/her team |
|       | 5    | Another faculty member                                           |
|       | 6    | Other (please specify)                                           |

|      |   |                                                          |
|------|---|----------------------------------------------------------|
| Q6   | 1 | Mentor                                                   |
|      | 2 | Second mentor                                            |
|      | 3 | This person was not listed on my Chronus connection plan |
| Q7_1 | 1 | No Gains                                                 |
|      | 2 | A Little Gain                                            |
|      | 3 | Moderate Gain                                            |
|      | 4 | Good Gain                                                |
|      | 5 | Great Gain                                               |
| Q7_2 | 1 | No Gains                                                 |
|      | 2 | A Little Gain                                            |
|      | 3 | Moderate Gain                                            |
|      | 4 | Good Gain                                                |
|      | 5 | Great Gain                                               |
| Q7_3 | 1 | No Gains                                                 |
|      | 2 | A Little Gain                                            |
|      | 3 | Moderate Gain                                            |
|      | 4 | Good Gain                                                |
|      | 5 | Great Gain                                               |
| Q7_4 | 1 | No Gains                                                 |
|      | 2 | A Little Gain                                            |
|      | 3 | Moderate Gain                                            |
|      | 4 | Good Gain                                                |
|      | 5 | Great Gain                                               |
| Q7_5 | 1 | No Gains                                                 |
|      | 2 | A Little Gain                                            |
|      | 3 | Moderate Gain                                            |
|      | 4 | Good Gain                                                |
|      | 5 | Great Gain                                               |
| Q7_6 | 1 | No Gains                                                 |
|      | 2 | A Little Gain                                            |
|      | 3 | Moderate Gain                                            |
|      | 4 | Good Gain                                                |
|      | 5 | Great Gain                                               |
| Q7_7 | 1 | No Gains                                                 |
|      | 2 | A Little Gain                                            |
|      | 3 | Moderate Gain                                            |
|      | 4 | Good Gain                                                |
|      | 5 | Great Gain                                               |

|      |   |               |
|------|---|---------------|
| Q7_8 | 1 | No Gains      |
|      | 2 | A Little Gain |
|      | 3 | Moderate Gain |
|      | 4 | Good Gain     |
|      | 5 | Great Gain    |
| Q8_1 | 1 | No Gains      |
|      | 2 | A Little Gain |
|      | 3 | Moderate Gain |
|      | 4 | Good Gain     |
|      | 5 | Great Gain    |
| Q8_2 | 1 | No Gains      |
|      | 2 | A Little Gain |
|      | 3 | Moderate Gain |
|      | 4 | Good Gain     |
|      | 5 | Great Gain    |
| Q8_3 | 1 | No Gains      |
|      | 2 | A Little Gain |
|      | 3 | Moderate Gain |
|      | 4 | Good Gain     |
|      | 5 | Great Gain    |
| Q8_4 | 1 | No Gains      |
|      | 2 | A Little Gain |
|      | 3 | Moderate Gain |
|      | 4 | Good Gain     |
|      | 5 | Great Gain    |
| Q8_5 | 1 | No Gains      |
|      | 2 | A Little Gain |
|      | 3 | Moderate Gain |
|      | 4 | Good Gain     |
|      | 5 | Great Gain    |
| Q8_6 | 1 | No Gains      |
|      | 2 | A Little Gain |
|      | 3 | Moderate Gain |
|      | 4 | Good Gain     |
|      | 5 | Great Gain    |
| Q8_7 | 1 | No Gains      |
|      | 2 | A Little Gain |
|      | 3 | Moderate Gain |

|      |   |               |
|------|---|---------------|
|      | 4 | Good Gain     |
|      | 5 | Great Gain    |
| Q9_1 | 1 | No Gains      |
|      | 2 | A Little Gain |
|      | 3 | Moderate Gain |
|      | 4 | Good Gain     |
|      | 5 | Great Gain    |
| Q9_2 | 1 | No Gains      |
|      | 2 | A Little Gain |
|      | 3 | Moderate Gain |
|      | 4 | Good Gain     |
|      | 5 | Great Gain    |
| Q9_3 | 1 | No Gains      |
|      | 2 | A Little Gain |
|      | 3 | Moderate Gain |
|      | 4 | Good Gain     |
|      | 5 | Great Gain    |
| Q9_4 | 1 | No Gains      |
|      | 2 | A Little Gain |
|      | 3 | Moderate Gain |
|      | 4 | Good Gain     |
|      | 5 | Great Gain    |
| Q9_5 | 1 | No Gains      |
|      | 2 | A Little Gain |
|      | 3 | Moderate Gain |
|      | 4 | Good Gain     |
|      | 5 | Great Gain    |
| Q9_6 | 1 | No Gains      |
|      | 2 | A Little Gain |
|      | 3 | Moderate Gain |
|      | 4 | Good Gain     |
|      | 5 | Great Gain    |
| Q9_7 | 1 | No Gains      |
|      | 2 | A Little Gain |
|      | 3 | Moderate Gain |
|      | 4 | Good Gain     |
|      | 5 | Great Gain    |
| Q9_8 | 1 | No Gains      |

|       |   |               |
|-------|---|---------------|
|       | 2 | A Little Gain |
|       | 3 | Moderate Gain |
|       | 4 | Good Gain     |
|       | 5 | Great Gain    |
| Q9_9  | 1 | No Gains      |
|       | 2 | A Little Gain |
|       | 3 | Moderate Gain |
|       | 4 | Good Gain     |
|       | 5 | Great Gain    |
| Q9_10 | 1 | No Gains      |
|       | 2 | A Little Gain |
|       | 3 | Moderate Gain |
|       | 4 | Good Gain     |
|       | 5 | Great Gain    |
| Q9_11 | 1 | No Gains      |
|       | 2 | A Little Gain |
|       | 3 | Moderate Gain |
|       | 4 | Good Gain     |
|       | 5 | Great Gain    |
| Q9_12 | 1 | No Gains      |
|       | 2 | A Little Gain |
|       | 3 | Moderate Gain |
|       | 4 | Good Gain     |
|       | 5 | Great Gain    |
| Q9_13 | 1 | No Gains      |
|       | 2 | A Little Gain |
|       | 3 | Moderate Gain |
|       | 4 | Good Gain     |
|       | 5 | Great Gain    |
| Q11_1 | 1 | None          |
|       | 2 | A Little      |
|       | 3 | Some          |
|       | 4 | A Fair Amount |
|       | 5 | A Great Deal  |
| Q11_2 | 1 | None          |
|       | 2 | A Little      |
|       | 3 | Some          |
|       | 4 | A Fair Amount |

|       |   |               |
|-------|---|---------------|
|       | 5 | A Great Deal  |
| Q11_3 | 1 | None          |
|       | 2 | A Little      |
|       | 3 | Some          |
|       | 4 | A Fair Amount |
|       | 5 | A Great Deal  |
| Q11_4 | 1 | None          |
|       | 2 | A Little      |
|       | 3 | Some          |
|       | 4 | A Fair Amount |
|       | 5 | A Great Deal  |
| Q11_5 | 1 | None          |
|       | 2 | A Little      |
|       | 3 | Some          |
|       | 4 | A Fair Amount |
|       | 5 | A Great Deal  |
| Q11_6 | 1 | None          |
|       | 2 | A Little      |
|       | 3 | Some          |
|       | 4 | A Fair Amount |
|       | 5 | A Great Deal  |
| Q11_7 | 1 | None          |
|       | 2 | A Little      |
|       | 3 | Some          |
|       | 4 | A Fair Amount |
|       | 5 | A Great Deal  |
| Q11_8 | 1 | None          |
|       | 2 | A Little      |
|       | 3 | Some          |
|       | 4 | A Fair Amount |
|       | 5 | A Great Deal  |
| Q12_1 | 1 | Poor          |
|       | 2 | Fair          |
|       | 3 | Good          |
|       | 4 | Excellent     |
| Q12_2 | 1 | Poor          |
|       | 2 | Fair          |
|       | 3 | Good          |

|        |   |                         |
|--------|---|-------------------------|
|        | 4 | Excellent               |
| Q12_3  | 1 | Poor                    |
|        | 2 | Fair                    |
|        | 3 | Good                    |
|        | 4 | Excellent               |
| Q12_4  | 1 | Poor                    |
|        | 2 | Fair                    |
|        | 3 | Good                    |
|        | 4 | Excellent               |
| Q12_5  | 1 | Poor                    |
|        | 2 | Fair                    |
|        | 3 | Good                    |
|        | 4 | Excellent               |
| Q12_6  | 1 | Poor                    |
|        | 2 | Fair                    |
|        | 3 | Good                    |
|        | 4 | Excellent               |
| Q13_1  | 1 | Yes                     |
|        | 2 | No                      |
| Q13_2  | 1 | Yes                     |
|        | 2 | No                      |
| Q13_3  | 1 | Yes                     |
|        | 2 | No                      |
| Q13_4  | 1 | Yes                     |
|        | 2 | No                      |
| Q13_5  | 1 | Yes                     |
|        | 2 | No                      |
| Q13_6  | 1 | Yes                     |
|        | 2 | No                      |
| Q13_7  | 1 | Yes                     |
|        | 2 | No                      |
| Q13_8  | 1 | Yes                     |
|        | 2 | No                      |
| Q13_9  | 1 | Yes                     |
|        | 2 | No                      |
| Q13_10 | 1 | Yes                     |
|        | 2 | No                      |
| Q14    | 1 | (1) Definitely will not |



|       |   |                       |
|-------|---|-----------------------|
|       | 2 | (2)                   |
|       | 3 | (3)                   |
|       | 4 | (4)                   |
|       | 5 | (5) Definitely will   |
| Q15_1 | 1 | Strongly Disagree     |
|       | 2 | Disagree              |
|       | 3 | Agree                 |
|       | 4 | Strongly Agree        |
| Q15_2 | 1 | Strongly Disagree     |
|       | 2 | Disagree              |
|       | 3 | Agree                 |
|       | 4 | Strongly Agree        |
| Q15_3 | 1 | Strongly Disagree     |
|       | 2 | Disagree              |
|       | 3 | Agree                 |
|       | 4 | Strongly Agree        |
| Q15_4 | 1 | Strongly Disagree     |
|       | 2 | Disagree              |
|       | 3 | Agree                 |
|       | 4 | Strongly Agree        |
| Q15_5 | 1 | Strongly Disagree     |
|       | 2 | Disagree              |
|       | 3 | Agree                 |
|       | 4 | Strongly Agree        |
| Q16_1 | 0 | NA                    |
|       | 1 | Not More Likely       |
|       | 2 | A Little More Likely  |
|       | 3 | Somewhat More Likely  |
|       | 4 | Much More Likely      |
|       | 5 | Extremely More Likely |
| Q16_2 | 0 | NA                    |
|       | 1 | Not More Likely       |
|       | 2 | A Little More Likely  |
|       | 3 | Somewhat More Likely  |
|       | 4 | Much More Likely      |
|       | 5 | Extremely More Likely |
| Q16_3 | 0 | NA                    |
|       | 1 | Not More Likely       |

|       |   |                       |
|-------|---|-----------------------|
|       | 2 | A Little More Likely  |
|       | 3 | Somewhat More Likely  |
|       | 4 | Much More Likely      |
|       | 5 | Extremely More Likely |
| Q16_4 | 0 | NA                    |
|       | 1 | Not More Likely       |
|       | 2 | A Little More Likely  |
|       | 3 | Somewhat More Likely  |
|       | 4 | Much More Likely      |
|       | 5 | Extremely More Likely |
| Q16_5 | 0 | NA                    |
|       | 1 | Not More Likely       |
|       | 2 | A Little More Likely  |
|       | 3 | Somewhat More Likely  |
|       | 4 | Much More Likely      |
|       | 5 | Extremely More Likely |
| Q16_6 | 0 | NA                    |
|       | 1 | Not More Likely       |
|       | 2 | A Little More Likely  |
|       | 3 | Somewhat More Likely  |
|       | 4 | Much More Likely      |
|       | 5 | Extremely More Likely |
| Q16_7 | 0 | NA                    |
|       | 1 | Not More Likely       |
|       | 2 | A Little More Likely  |
|       | 3 | Somewhat More Likely  |
|       | 4 | Much More Likely      |
|       | 5 | Extremely More Likely |
| Q18_1 | 1 | Very Dissatisfied     |
|       | 2 | Dissatisfied          |
|       | 3 | Satisfied             |
|       | 4 | Very Satisfied        |
| Q18_2 | 1 | Very Dissatisfied     |
|       | 2 | Dissatisfied          |
|       | 3 | Satisfied             |
|       | 4 | Very Satisfied        |
| Q18_3 | 1 | Very Dissatisfied     |
|       | 2 | Dissatisfied          |

|        |   |                           |
|--------|---|---------------------------|
|        | 3 | Satisfied                 |
|        | 4 | Very Satisfied            |
| Q18_5  | 1 | Very Dissatisfied         |
|        | 2 | Dissatisfied              |
|        | 3 | Satisfied                 |
|        | 4 | Very Satisfied            |
| Q18_6  | 1 | Very Dissatisfied         |
|        | 2 | Dissatisfied              |
|        | 3 | Satisfied                 |
|        | 4 | Very Satisfied            |
| Q18_7  | 1 | Very Dissatisfied         |
|        | 2 | Dissatisfied              |
|        | 3 | Satisfied                 |
|        | 4 | Very Satisfied            |
| Q18_8  | 1 | Very Dissatisfied         |
|        | 2 | Dissatisfied              |
|        | 3 | Satisfied                 |
|        | 4 | Very Satisfied            |
| Q18_9  | 1 | Very Dissatisfied         |
|        | 2 | Dissatisfied              |
|        | 3 | Satisfied                 |
|        | 4 | Very Satisfied            |
| Q18_12 | 1 | Very Dissatisfied         |
|        | 2 | Dissatisfied              |
|        | 3 | Satisfied                 |
|        | 4 | Very Satisfied            |
| Q18_13 | 1 | Very Dissatisfied         |
|        | 2 | Dissatisfied              |
|        | 3 | Satisfied                 |
|        | 4 | Very Satisfied            |
| Q19    | 1 | Yes                       |
|        | 2 | No                        |
|        | 3 | Not Applicable/Don't Know |
| Q20    | 1 | Never participated        |
|        | 2 | 1 semester                |
|        | 3 | 2 semesters               |
|        | 4 | 3 semesters               |
|        | 5 | 4 or more semesters       |

|         |    |                      |
|---------|----|----------------------|
| Q21     | 1  | Never participated   |
|         | 2  | 1 summer             |
|         | 3  | 2 summers            |
|         | 4  | 3 summers            |
| Q22     | 1  | 1-5 hours            |
|         | 2  | 6-10 hours           |
|         | 3  | 11-15 hours          |
|         | 4  | 16-20 hours          |
|         | 5  | 21 or more hours     |
| Q23     | 1  | None                 |
|         | 2  | 1 hour               |
|         | 3  | 2 hours              |
|         | 4  | 3 hours              |
|         | 5  | 4 or more hours      |
| Q24     | 9  | Yes                  |
|         | 10 | No                   |
| Q25_1_1 | 1  | Not at all Important |
|         | 2  | Somewhat Important   |
|         | 3  | Very Important       |
|         | 4  | Essential            |
| Q25_1_2 | 1  | Not at all Important |
|         | 2  | Somewhat Important   |
|         | 3  | Very Important       |
|         | 4  | Essential            |
| Q25_1_3 | 1  | Not at all Important |
|         | 2  | Somewhat Important   |
|         | 3  | Very Important       |
|         | 4  | Essential            |
| Q25_2_1 | 1  | Not at all Important |
|         | 2  | Somewhat Important   |
|         | 3  | Very Important       |
|         | 4  | Essential            |
| Q25_2_2 | 1  | Not at all Important |
|         | 2  | Somewhat Important   |
|         | 3  | Very Important       |
|         | 4  | Essential            |
| Q25_2_3 | 1  | Not at all Important |
|         | 2  | Somewhat Important   |

|         |   |                            |
|---------|---|----------------------------|
|         | 3 | Very Important             |
|         | 4 | Essential                  |
| Q26_1_1 | 1 | Strongly Disagree          |
|         | 2 | Disagree                   |
|         | 3 | Neither Disagree nor Agree |
|         | 4 | Agree                      |
|         | 5 | Strongly Agree             |
| Q26_1_2 | 1 | Strongly Disagree          |
|         | 2 | Disagree                   |
|         | 3 | Neither Disagree nor Agree |
|         | 4 | Agree                      |
|         | 5 | Strongly Agree             |
| Q26_1_3 | 1 | Strongly Disagree          |
|         | 2 | Disagree                   |
|         | 3 | Neither Disagree nor Agree |
|         | 4 | Agree                      |
|         | 5 | Strongly Agree             |
| Q26_1_4 | 1 | Strongly Disagree          |
|         | 2 | Disagree                   |
|         | 3 | Neither Disagree nor Agree |
|         | 4 | Agree                      |
|         | 5 | Strongly Agree             |
| Q26_2_1 | 1 | Strongly Disagree          |
|         | 2 | Disagree                   |
|         | 3 | Neither Disagree nor Agree |
|         | 4 | Agree                      |
|         | 5 | Strongly Agree             |
| Q26_2_2 | 1 | Strongly Disagree          |
|         | 2 | Disagree                   |
|         | 3 | Neither Disagree nor Agree |
|         | 4 | Agree                      |
|         | 5 | Strongly Agree             |
| Q26_2_3 | 1 | Strongly Disagree          |
|         | 2 | Disagree                   |
|         | 3 | Neither Disagree nor Agree |
|         | 4 | Agree                      |
|         | 5 | Strongly Agree             |
| Q26_2_4 | 1 | Strongly Disagree          |

|         |   |                            |
|---------|---|----------------------------|
|         | 2 | Disagree                   |
|         | 3 | Neither Disagree nor Agree |
|         | 4 | Agree                      |
|         | 5 | Strongly Agree             |
| Q27_1_1 | 1 | Not at all Confident       |
|         | 2 | Somewhat Confident         |
|         | 3 | Moderately Confident       |
|         | 4 | Very Confident             |
|         | 5 | Absolutely Confident       |
| Q27_1_2 | 1 | Not at all Confident       |
|         | 2 | Somewhat Confident         |
|         | 3 | Moderately Confident       |
|         | 4 | Very Confident             |
|         | 5 | Absolutely Confident       |
| Q27_1_3 | 1 | Not at all Confident       |
|         | 2 | Somewhat Confident         |
|         | 3 | Moderately Confident       |
|         | 4 | Very Confident             |
|         | 5 | Absolutely Confident       |
| Q27_1_4 | 1 | Not at all Confident       |
|         | 2 | Somewhat Confident         |
|         | 3 | Moderately Confident       |
|         | 4 | Very Confident             |
|         | 5 | Absolutely Confident       |
| Q27_1_5 | 1 | Not at all Confident       |
|         | 2 | Somewhat Confident         |
|         | 3 | Moderately Confident       |
|         | 4 | Very Confident             |
|         | 5 | Absolutely Confident       |
| Q27_1_6 | 1 | Not at all Confident       |
|         | 2 | Somewhat Confident         |
|         | 3 | Moderately Confident       |
|         | 4 | Very Confident             |
|         | 5 | Absolutely Confident       |
| Q27_1_7 | 1 | Not at all Confident       |
|         | 2 | Somewhat Confident         |
|         | 3 | Moderately Confident       |
|         | 4 | Very Confident             |

|          |   |                      |
|----------|---|----------------------|
|          | 5 | Absolutely Confident |
| Q27_1_8  | 1 | Not at all Confident |
|          | 2 | Somewhat Confident   |
|          | 3 | Moderately Confident |
|          | 4 | Very Confident       |
|          | 5 | Absolutely Confident |
| Q27_1_9  | 1 | Not at all Confident |
|          | 2 | Somewhat Confident   |
|          | 3 | Moderately Confident |
|          | 4 | Very Confident       |
|          | 5 | Absolutely Confident |
| Q27_1_10 | 1 | Not at all Confident |
|          | 2 | Somewhat Confident   |
|          | 3 | Moderately Confident |
|          | 4 | Very Confident       |
|          | 5 | Absolutely Confident |
| Q27_2_1  | 1 | Not at all Confident |
|          | 2 | Somewhat Confident   |
|          | 3 | Moderately Confident |
|          | 4 | Very Confident       |
|          | 5 | Absolutely Confident |
| Q27_2_2  | 1 | Not at all Confident |
|          | 2 | Somewhat Confident   |
|          | 3 | Moderately Confident |
|          | 4 | Very Confident       |
|          | 5 | Absolutely Confident |
| Q27_2_3  | 1 | Not at all Confident |
|          | 2 | Somewhat Confident   |
|          | 3 | Moderately Confident |
|          | 4 | Very Confident       |
|          | 5 | Absolutely Confident |
| Q27_2_4  | 1 | Not at all Confident |
|          | 2 | Somewhat Confident   |
|          | 3 | Moderately Confident |
|          | 4 | Very Confident       |
|          | 5 | Absolutely Confident |
| Q27_2_5  | 1 | Not at all Confident |
|          | 2 | Somewhat Confident   |

|          |   |                             |
|----------|---|-----------------------------|
|          | 3 | Moderately Confident        |
|          | 4 | Very Confident              |
|          | 5 | Absolutely Confident        |
| Q27_2_6  | 1 | Not at all Confident        |
|          | 2 | Somewhat Confident          |
|          | 3 | Moderately Confident        |
|          | 4 | Very Confident              |
|          | 5 | Absolutely Confident        |
| Q27_2_7  | 1 | Not at all Confident        |
|          | 2 | Somewhat Confident          |
|          | 3 | Moderately Confident        |
|          | 4 | Very Confident              |
|          | 5 | Absolutely Confident        |
| Q27_2_8  | 1 | Not at all Confident        |
|          | 2 | Somewhat Confident          |
|          | 3 | Moderately Confident        |
|          | 4 | Very Confident              |
|          | 5 | Absolutely Confident        |
| Q27_2_9  | 1 | Not at all Confident        |
|          | 2 | Somewhat Confident          |
|          | 3 | Moderately Confident        |
|          | 4 | Very Confident              |
|          | 5 | Absolutely Confident        |
| Q27_2_10 | 1 | Not at all Confident        |
|          | 2 | Somewhat Confident          |
|          | 3 | Moderately Confident        |
|          | 4 | Very Confident              |
|          | 5 | Absolutely Confident        |
| Q28_1_1  | 1 | Extremely Unlikely          |
|          | 2 | Somewhat Unlikely           |
|          | 3 | Neither Likely nor Unlikely |
|          | 4 | Somewhat Likely             |
|          | 5 | Extremely Likely            |
| Q28_2_1  | 1 | Extremely Unlikely          |
|          | 2 | Somewhat Unlikely           |
|          | 3 | Neither Likely nor Unlikely |
|          | 4 | Somewhat Likely             |
|          | 5 | Extremely Likely            |



|       |   |                    |
|-------|---|--------------------|
| Q29_1 | 1 | Not like me at all |
|       | 2 | Not much like me   |
|       | 3 | Somewhat like me   |
|       | 4 | Mostly like me     |
|       | 5 | Very much like me  |
| Q29_2 | 1 | Not like me at all |
|       | 2 | Not much like me   |
|       | 3 | Somewhat like me   |
|       | 4 | Mostly like me     |
|       | 5 | Very much like me  |
| Q29_3 | 1 | Not like me at all |
|       | 2 | Not much like me   |
|       | 3 | Somewhat like me   |
|       | 4 | Mostly like me     |
|       | 5 | Very much like me  |
| Q29_4 | 1 | Not like me at all |
|       | 2 | Not much like me   |
|       | 3 | Somewhat like me   |
|       | 4 | Mostly like me     |
|       | 5 | Very much like me  |
| Q29_5 | 1 | Not like me at all |
|       | 2 | Not much like me   |
|       | 3 | Somewhat like me   |
|       | 4 | Mostly like me     |
|       | 5 | Very much like me  |
| Q29_6 | 1 | Not like me at all |
|       | 2 | Not much like me   |
|       | 3 | Somewhat like me   |
|       | 4 | Mostly like me     |
|       | 5 | Very much like me  |
| Q29_7 | 1 | Not like me at all |
|       | 2 | Not much like me   |
|       | 3 | Somewhat like me   |
|       | 4 | Mostly like me     |
|       | 5 | Very much like me  |
| Q29_8 | 1 | Not like me at all |
|       | 2 | Not much like me   |
|       | 3 | Somewhat like me   |

|        |   |                    |
|--------|---|--------------------|
|        | 4 | Mostly like me     |
|        | 5 | Very much like me  |
| Q29_9  | 1 | Not like me at all |
|        | 2 | Not much like me   |
|        | 3 | Somewhat like me   |
|        | 4 | Mostly like me     |
|        | 5 | Very much like me  |
| Q29_10 | 1 | Not like me at all |
|        | 2 | Not much like me   |
|        | 3 | Somewhat like me   |
|        | 4 | Mostly like me     |
|        | 5 | Very much like me  |
| Q29_11 | 1 | Not like me at all |
|        | 2 | Not much like me   |
|        | 3 | Somewhat like me   |
|        | 4 | Mostly like me     |
|        | 5 | Very much like me  |
| Q29_12 | 1 | Not like me at all |
|        | 2 | Not much like me   |
|        | 3 | Somewhat like me   |
|        | 4 | Mostly like me     |
|        | 5 | Very much like me  |
| Q30_1  | 1 | Not Well at All    |
|        | 2 | Slightly Well      |
|        | 3 | Somewhat Well      |
|        | 4 | Very Well          |
|        | 5 | Extremely Well     |
| Q30_2  | 1 | Not Well at All    |
|        | 2 | Slightly Well      |
|        | 3 | Somewhat Well      |
|        | 4 | Very Well          |
|        | 5 | Extremely Well     |
| Q30_3  | 1 | Not Well at All    |
|        | 2 | Slightly Well      |
|        | 3 | Somewhat Well      |
|        | 4 | Very Well          |
|        | 5 | Extremely Well     |
| Q30_4  | 0 | NA                 |

|       |   |                            |
|-------|---|----------------------------|
|       | 1 | Not Well at All            |
|       | 2 | Slightly Well              |
|       | 3 | Somewhat Well              |
|       | 4 | Very Well                  |
|       | 5 | Extremely Well             |
| Q31_1 | 1 | Strongly Disagree          |
|       | 2 | Disagree                   |
|       | 3 | Neither Agree nor Disagree |
|       | 4 | Agree                      |
|       | 5 | Strongly Agree             |
| Q31_2 | 1 | Strongly Disagree          |
|       | 2 | Disagree                   |
|       | 3 | Neither Agree nor Disagree |
|       | 4 | Agree                      |
|       | 5 | Strongly Agree             |
| Q31_3 | 1 | Strongly Disagree          |
|       | 2 | Disagree                   |
|       | 3 | Neither Agree nor Disagree |
|       | 4 | Agree                      |
|       | 5 | Strongly Agree             |
| Q31_4 | 1 | Strongly Disagree          |
|       | 2 | Disagree                   |
|       | 3 | Neither Agree nor Disagree |
|       | 4 | Agree                      |
|       | 5 | Strongly Agree             |
| Q31_5 | 1 | Strongly Disagree          |
|       | 2 | Disagree                   |
|       | 3 | Neither Agree nor Disagree |
|       | 4 | Agree                      |
|       | 5 | Strongly Agree             |
| Q31_6 | 1 | Strongly Disagree          |
|       | 2 | Disagree                   |
|       | 3 | Neither Agree nor Disagree |
|       | 4 | Agree                      |
|       | 5 | Strongly Agree             |
| Q32_1 | 1 | No Confidence              |
|       | 2 | Very Little Confidence     |
|       | 3 | Some Confidence            |

|       |   |                        |
|-------|---|------------------------|
|       | 4 | Much Confidence        |
|       | 5 | Complete Confidence    |
| Q32_2 | 1 | No Confidence          |
|       | 2 | Very Little Confidence |
|       | 3 | Some Confidence        |
|       | 4 | Much Confidence        |
|       | 5 | Complete Confidence    |
| Q32_3 | 1 | No Confidence          |
|       | 2 | Very Little Confidence |
|       | 3 | Some Confidence        |
|       | 4 | Much Confidence        |
|       | 5 | Complete Confidence    |
| Q32_4 | 1 | No Confidence          |
|       | 2 | Very Little Confidence |
|       | 3 | Some Confidence        |
|       | 4 | Much Confidence        |
|       | 5 | Complete Confidence    |
| Q32_5 | 1 | No Confidence          |
|       | 2 | Very Little Confidence |
|       | 3 | Some Confidence        |
|       | 4 | Much Confidence        |
|       | 5 | Complete Confidence    |
| Q32_6 | 1 | No Confidence          |
|       | 2 | Very Little Confidence |
|       | 3 | Some Confidence        |
|       | 4 | Much Confidence        |
|       | 5 | Complete Confidence    |
| Q32_7 | 1 | No Confidence          |
|       | 2 | Very Little Confidence |
|       | 3 | Some Confidence        |
|       | 4 | Much Confidence        |
|       | 5 | Complete Confidence    |
| Q32_8 | 1 | No Confidence          |
|       | 2 | Very Little Confidence |
|       | 3 | Some Confidence        |
|       | 4 | Much Confidence        |
|       | 5 | Complete Confidence    |
| Q32_9 | 1 | No Confidence          |

|        |   |                            |
|--------|---|----------------------------|
|        | 2 | Very Little Confidence     |
|        | 3 | Some Confidence            |
|        | 4 | Much Confidence            |
|        | 5 | Complete Confidence        |
| Q32_10 | 1 | No Confidence              |
|        | 2 | Very Little Confidence     |
|        | 3 | Some Confidence            |
|        | 4 | Much Confidence            |
|        | 5 | Complete Confidence        |
| Q33_1  | 1 | Strongly Disagree          |
|        | 2 | Disagree                   |
|        | 3 | Neither Agree nor Disagree |
|        | 4 | Agree                      |
|        | 5 | Strongly Agree             |
| Q33_2  | 1 | Strongly Disagree          |
|        | 2 | Disagree                   |
|        | 3 | Neither Agree nor Disagree |
|        | 4 | Agree                      |
|        | 5 | Strongly Agree             |
| Q33_3  | 1 | Strongly Disagree          |
|        | 2 | Disagree                   |
|        | 3 | Neither Agree nor Disagree |
|        | 4 | Agree                      |
|        | 5 | Strongly Agree             |
| Q33_4  | 1 | Strongly Disagree          |
|        | 2 | Disagree                   |
|        | 3 | Neither Agree nor Disagree |
|        | 4 | Agree                      |
|        | 5 | Strongly Agree             |
| Q33_5  | 1 | Strongly Disagree          |
|        | 2 | Disagree                   |
|        | 3 | Neither Agree nor Disagree |
|        | 4 | Agree                      |
|        | 5 | Strongly Agree             |
| Q34_1  | 1 | Not at all Important       |
|        | 2 | Somewhat Important         |
|        | 3 | Very Important             |
| Q34_2  | 1 | Not at all Important       |

|       |   |                      |
|-------|---|----------------------|
|       | 2 | Somewhat Important   |
|       | 3 | Very Important       |
| Q34_3 | 1 | Not at all Important |
|       | 2 | Somewhat Important   |
|       | 3 | Very Important       |
| Q35_1 | 1 | Not at all Skilled   |
|       | 2 | Somewhat Skilled     |
|       | 3 | Very Skilled         |
| Q35_2 | 1 | Not at all Skilled   |
|       | 2 | Somewhat Skilled     |
|       | 3 | Very Skilled         |
| Q35_3 | 1 | Not at all Skilled   |
|       | 2 | Somewhat Skilled     |
|       | 3 | Very Skilled         |
| Q36_1 | 1 | Not at all           |
|       | 2 | Slightly             |
|       | 3 | Somewhat             |
|       | 4 | Neutral              |
|       | 5 | Moderately           |
|       | 6 | Very                 |
|       | 7 | Extremely            |
| Q36_2 | 1 | Not at all           |
|       | 2 | Slightly             |
|       | 3 | Somewhat             |
|       | 4 | Neutral              |
|       | 5 | Moderately           |
|       | 6 | Very                 |
|       | 7 | Extremely            |
| Q36_3 | 1 | Not at all           |
|       | 2 | Slightly             |
|       | 3 | Somewhat             |
|       | 4 | Neutral              |
|       | 5 | Moderately           |
|       | 6 | Very                 |
|       | 7 | Extremely            |
| Q36_4 | 1 | Not at all           |
|       | 2 | Slightly             |
|       | 3 | Somewhat             |

|       |   |            |
|-------|---|------------|
|       | 4 | Neutral    |
|       | 5 | Moderately |
|       | 6 | Very       |
|       | 7 | Extremely  |
| Q36_5 | 1 | Not at all |
|       | 2 | Slightly   |
|       | 3 | Somewhat   |
|       | 4 | Neutral    |
|       | 5 | Moderately |
|       | 6 | Very       |
|       | 7 | Extremely  |
| Q36_6 | 1 | Not at all |
|       | 2 | Slightly   |
|       | 3 | Somewhat   |
|       | 4 | Neutral    |
|       | 5 | Moderately |
|       | 6 | Very       |
|       | 7 | Extremely  |
| Q36_7 | 1 | Not at all |
|       | 2 | Slightly   |
|       | 3 | Somewhat   |
|       | 4 | Neutral    |
|       | 5 | Moderately |
|       | 6 | Very       |
|       | 7 | Extremely  |
| Q36_8 | 1 | Not at all |
|       | 2 | Slightly   |
|       | 3 | Somewhat   |
|       | 4 | Neutral    |
|       | 5 | Moderately |
|       | 6 | Very       |
|       | 7 | Extremely  |
| Q36_9 | 1 | Not at all |
|       | 2 | Slightly   |
|       | 3 | Somewhat   |
|       | 4 | Neutral    |
|       | 5 | Moderately |
|       | 6 | Very       |

|        |   |            |
|--------|---|------------|
|        | 7 | Extremely  |
| Q36_10 | 1 | Not at all |
|        | 2 | Slightly   |
|        | 3 | Somewhat   |
|        | 4 | Neutral    |
|        | 5 | Moderately |
|        | 6 | Very       |
|        | 7 | Extremely  |
| Q36_11 | 1 | Not at all |
|        | 2 | Slightly   |
|        | 3 | Somewhat   |
|        | 4 | Neutral    |
|        | 5 | Moderately |
|        | 6 | Very       |
|        | 7 | Extremely  |
| Q36_12 | 1 | Not at all |
|        | 2 | Slightly   |
|        | 3 | Somewhat   |
|        | 4 | Neutral    |
|        | 5 | Moderately |
|        | 6 | Very       |
|        | 7 | Extremely  |
| Q36_13 | 1 | Not at all |
|        | 2 | Slightly   |
|        | 3 | Somewhat   |
|        | 4 | Neutral    |
|        | 5 | Moderately |
|        | 6 | Very       |
|        | 7 | Extremely  |
| Q36_26 | 1 | Not at all |
|        | 2 | Slightly   |
|        | 3 | Somewhat   |
|        | 4 | Neutral    |
|        | 5 | Moderately |
|        | 6 | Very       |
|        | 7 | Extremely  |
| Q36_14 | 1 | Not at all |
|        | 2 | Slightly   |



|        |   |            |
|--------|---|------------|
|        | 3 | Somewhat   |
|        | 4 | Neutral    |
|        | 5 | Moderately |
|        | 6 | Very       |
|        | 7 | Extremely  |
| Q36_15 | 1 | Not at all |
|        | 2 | Slightly   |
|        | 3 | Somewhat   |
|        | 4 | Neutral    |
|        | 5 | Moderately |
|        | 6 | Very       |
|        | 7 | Extremely  |
| Q36_16 | 1 | Not at all |
|        | 2 | Slightly   |
|        | 3 | Somewhat   |
|        | 4 | Neutral    |
|        | 5 | Moderately |
|        | 6 | Very       |
|        | 7 | Extremely  |
| Q36_17 | 1 | Not at all |
|        | 2 | Slightly   |
|        | 3 | Somewhat   |
|        | 4 | Neutral    |
|        | 5 | Moderately |
|        | 6 | Very       |
|        | 7 | Extremely  |
| Q36_18 | 1 | Not at all |
|        | 2 | Slightly   |
|        | 3 | Somewhat   |
|        | 4 | Neutral    |
|        | 5 | Moderately |
|        | 6 | Very       |
|        | 7 | Extremely  |
| Q36_19 | 1 | Not at all |
|        | 2 | Slightly   |
|        | 3 | Somewhat   |
|        | 4 | Neutral    |
|        | 5 | Moderately |

|        |   |            |
|--------|---|------------|
|        | 6 | Very       |
|        | 7 | Extremely  |
| Q36_20 | 1 | Not at all |
|        | 2 | Slightly   |
|        | 3 | Somewhat   |
|        | 4 | Neutral    |
|        | 5 | Moderately |
|        | 6 | Very       |
|        | 7 | Extremely  |
| Q36_21 | 1 | Not at all |
|        | 2 | Slightly   |
|        | 3 | Somewhat   |
|        | 4 | Neutral    |
|        | 5 | Moderately |
|        | 6 | Very       |
|        | 7 | Extremely  |
| Q36_22 | 1 | Not at all |
|        | 2 | Slightly   |
|        | 3 | Somewhat   |
|        | 4 | Neutral    |
|        | 5 | Moderately |
|        | 6 | Very       |
|        | 7 | Extremely  |
| Q36_23 | 1 | Not at all |
|        | 2 | Slightly   |
|        | 3 | Somewhat   |
|        | 4 | Neutral    |
|        | 5 | Moderately |
|        | 6 | Very       |
|        | 7 | Extremely  |
| Q36_24 | 1 | Not at all |
|        | 2 | Slightly   |
|        | 3 | Somewhat   |
|        | 4 | Neutral    |
|        | 5 | Moderately |
|        | 6 | Very       |
|        | 7 | Extremely  |
| Q36_25 | 1 | Not at all |

|       |   |                                                  |
|-------|---|--------------------------------------------------|
|       | 2 | Slightly                                         |
|       | 3 | Somewhat                                         |
|       | 4 | Neutral                                          |
|       | 5 | Moderately                                       |
|       | 6 | Very                                             |
|       | 7 | Extremely                                        |
| Q37_1 | 1 | My mentor did not do this                        |
|       | 2 | My mentor tried to do this but was ineffective   |
|       | 3 | My mentor did this sometimes, and was effective  |
|       | 4 | My mentor did this frequently, and was effective |
| Q37_2 | 1 | My mentor did not do this                        |
|       | 2 | My mentor tried to do this but was ineffective   |
|       | 3 | My mentor did this sometimes, and was effective  |
|       | 4 | My mentor did this frequently, and was effective |
| Q37_3 | 1 | My mentor did not do this                        |
|       | 2 | My mentor tried to do this but was ineffective   |
|       | 3 | My mentor did this sometimes, and was effective  |
|       | 4 | My mentor did this frequently, and was effective |
| Q37_4 | 1 | My mentor did not do this                        |
|       | 2 | My mentor tried to do this but was ineffective   |
|       | 3 | My mentor did this sometimes, and was effective  |
|       | 4 | My mentor did this frequently, and was effective |
| Q37_5 | 1 | My mentor did not do this                        |
|       | 2 | My mentor tried to do this but was ineffective   |
|       | 3 | My mentor did this sometimes, and was effective  |
|       | 4 | My mentor did this frequently, and was effective |
| Q37_6 | 1 | My mentor did not do this                        |
|       | 2 | My mentor tried to do this but was ineffective   |
|       | 3 | My mentor did this sometimes, and was effective  |
|       | 4 | My mentor did this frequently, and was effective |
| Q37_7 | 1 | My mentor did not do this                        |
|       | 2 | My mentor tried to do this but was ineffective   |
|       | 3 | My mentor did this sometimes, and was effective  |
|       | 4 | My mentor did this frequently, and was effective |
| Q37_8 | 1 | My mentor did not do this                        |
|       | 2 | My mentor tried to do this but was ineffective   |
|       | 3 | My mentor did this sometimes, and was effective  |
|       | 4 | My mentor did this frequently, and was effective |

|        |   |                                                  |
|--------|---|--------------------------------------------------|
| Q37_9  | 1 | My mentor did not do this                        |
|        | 2 | My mentor tried to do this but was ineffective   |
|        | 3 | My mentor did this sometimes, and was effective  |
|        | 4 | My mentor did this frequently, and was effective |
| Q37_10 | 1 | My mentor did not do this                        |
|        | 2 | My mentor tried to do this but was ineffective   |
|        | 3 | My mentor did this sometimes, and was effective  |
|        | 4 | My mentor did this frequently, and was effective |
| Q37_11 | 1 | My mentor did not do this                        |
|        | 2 | My mentor tried to do this but was ineffective   |
|        | 3 | My mentor did this sometimes, and was effective  |
|        | 4 | My mentor did this frequently, and was effective |
| Q37_12 | 1 | My mentor did not do this                        |
|        | 2 | My mentor tried to do this but was ineffective   |
|        | 3 | My mentor did this sometimes, and was effective  |
|        | 4 | My mentor did this frequently, and was effective |
| Q37_13 | 1 | My mentor did not do this                        |
|        | 2 | My mentor tried to do this but was ineffective   |
|        | 3 | My mentor did this sometimes, and was effective  |
|        | 4 | My mentor did this frequently, and was effective |
| Q37_14 | 1 | My mentor did not do this                        |
|        | 2 | My mentor tried to do this but was ineffective   |
|        | 3 | My mentor did this sometimes, and was effective  |
|        | 4 | My mentor did this frequently, and was effective |
| Q37_15 | 1 | My mentor did not do this                        |
|        | 2 | My mentor tried to do this but was ineffective   |
|        | 3 | My mentor did this sometimes, and was effective  |
|        | 4 | My mentor did this frequently, and was effective |
| Q37_16 | 1 | My mentor did not do this                        |
|        | 2 | My mentor tried to do this but was ineffective   |
|        | 3 | My mentor did this sometimes, and was effective  |
|        | 4 | My mentor did this frequently, and was effective |
| Q37_17 | 1 | My mentor did not do this                        |
|        | 2 | My mentor tried to do this but was ineffective   |
|        | 3 | My mentor did this sometimes, and was effective  |
|        | 4 | My mentor did this frequently, and was effective |
| Q37_18 | 1 | My mentor did not do this                        |
|        | 2 | My mentor tried to do this but was ineffective   |

|        |   |                                                  |
|--------|---|--------------------------------------------------|
|        | 3 | My mentor did this sometimes, and was effective  |
|        | 4 | My mentor did this frequently, and was effective |
| Q37_19 | 1 | My mentor did not do this                        |
|        | 2 | My mentor tried to do this but was ineffective   |
|        | 3 | My mentor did this sometimes, and was effective  |
|        | 4 | My mentor did this frequently, and was effective |
| Q37_20 | 1 | My mentor did not do this                        |
|        | 2 | My mentor tried to do this but was ineffective   |
|        | 3 | My mentor did this sometimes, and was effective  |
|        | 4 | My mentor did this frequently, and was effective |
| Q37_21 | 1 | My mentor did not do this                        |
|        | 2 | My mentor tried to do this but was ineffective   |
|        | 3 | My mentor did this sometimes, and was effective  |
|        | 4 | My mentor did this frequently, and was effective |
| Q37_22 | 1 | My mentor did not do this                        |
|        | 2 | My mentor tried to do this but was ineffective   |
|        | 3 | My mentor did this sometimes, and was effective  |
|        | 4 | My mentor did this frequently, and was effective |
| Q37_23 | 1 | My mentor did not do this                        |
|        | 2 | My mentor tried to do this but was ineffective   |
|        | 3 | My mentor did this sometimes, and was effective  |
|        | 4 | My mentor did this frequently, and was effective |
| Q37_24 | 1 | My mentor did not do this                        |
|        | 2 | My mentor tried to do this but was ineffective   |
|        | 3 | My mentor did this sometimes, and was effective  |
|        | 4 | My mentor did this frequently, and was effective |
| Q37_25 | 1 | My mentor did not do this                        |
|        | 2 | My mentor tried to do this but was ineffective   |
|        | 3 | My mentor did this sometimes, and was effective  |
|        | 4 | My mentor did this frequently, and was effective |
| Q37_26 | 1 | My mentor did not do this                        |
|        | 2 | My mentor tried to do this but was ineffective   |
|        | 3 | My mentor did this sometimes, and was effective  |
|        | 4 | My mentor did this frequently, and was effective |
| Q38    | 5 | No                                               |
|        | 6 | Yes                                              |
| Q39    | 1 | 1 - Very Poor                                    |
|        | 2 | 2                                                |

|       |   |                           |
|-------|---|---------------------------|
|       | 3 | 3                         |
|       | 4 | 4                         |
|       | 5 | 5 - Excellent             |
| Q40   | 5 | No                        |
|       | 6 | Yes                       |
| Q41   | 1 | 1 - Strongly dissatisfied |
|       | 2 | 2                         |
|       | 3 | 3                         |
|       | 4 | 4                         |
|       | 5 | 5 - Strongly satisfied    |
| Q42_1 | 1 | 1 - Strongly disagree     |
|       | 2 | 2                         |
|       | 3 | 3                         |
|       | 4 | 4                         |
|       | 5 | 5                         |
|       | 6 | 6                         |
|       | 7 | 7 - Strongly agree        |
| Q42_2 | 1 | 1 - Strongly disagree     |
|       | 2 | 2                         |
|       | 3 | 3                         |
|       | 4 | 4                         |
|       | 5 | 5                         |
|       | 6 | 6                         |
|       | 7 | 7 - Strongly agree        |
| Q42_3 | 1 | 1 - Strongly disagree     |
|       | 2 | 2                         |
|       | 3 | 3                         |
|       | 4 | 4                         |
|       | 5 | 5                         |
|       | 6 | 6                         |
|       | 7 | 7 - Strongly agree        |
| Q42_4 | 1 | 1 - Strongly disagree     |
|       | 2 | 2                         |
|       | 3 | 3                         |
|       | 4 | 4                         |
|       | 5 | 5                         |
|       | 6 | 6                         |
|       | 7 | 7 - Strongly agree        |

|         |   |                          |
|---------|---|--------------------------|
| Q42_5   | 1 | 1 - Strongly disagree    |
|         | 2 | 2                        |
|         | 3 | 3                        |
|         | 4 | 4                        |
|         | 5 | 5                        |
|         | 6 | 6                        |
|         | 7 | 7 - Strongly agree       |
| Q42_6   | 1 | 1 - Strongly disagree    |
|         | 2 | 2                        |
|         | 3 | 3                        |
|         | 4 | 4                        |
|         | 5 | 5                        |
|         | 6 | 6                        |
|         | 7 | 7 - Strongly agree       |
| Q45     | 1 | At UTEP                  |
|         | 2 | At a Partner Institution |
| Q46_1_1 | 1 | Poor                     |
|         | 2 | Fair                     |
|         | 3 | Good                     |
|         | 4 | Very Good                |
|         | 5 | Excellent                |
| Q46_1_2 | 1 | Poor                     |
|         | 2 | Fair                     |
|         | 3 | Good                     |
|         | 4 | Very Good                |
|         | 5 | Excellent                |
| Q46_1_3 | 1 | Poor                     |
|         | 2 | Fair                     |
|         | 3 | Good                     |
|         | 4 | Very Good                |
|         | 5 | Excellent                |
| Q46_1_4 | 1 | Poor                     |
|         | 2 | Fair                     |
|         | 3 | Good                     |
|         | 4 | Very Good                |
|         | 5 | Excellent                |
| Q69_1   | 1 | Poor                     |
|         | 2 | Fair                     |

|       |   |                                           |
|-------|---|-------------------------------------------|
|       | 3 | Good                                      |
|       | 4 | Very Good                                 |
|       | 5 | Excellent                                 |
| Q69_2 | 1 | Poor                                      |
|       | 2 | Fair                                      |
|       | 3 | Good                                      |
|       | 4 | Very Good                                 |
|       | 5 | Excellent                                 |
| Q69_3 | 1 | Poor                                      |
|       | 2 | Fair                                      |
|       | 3 | Good                                      |
|       | 4 | Very Good                                 |
|       | 5 | Excellent                                 |
| Q69_4 | 1 | Poor                                      |
|       | 2 | Fair                                      |
|       | 3 | Good                                      |
|       | 4 | Very Good                                 |
|       | 5 | Excellent                                 |
| Q47   | 1 | Not at all useful                         |
|       | 2 | Slightly useful                           |
|       | 3 | Moderately useful                         |
|       | 4 | Very useful                               |
|       | 5 | Extremely useful                          |
| Q52   | 1 | Male                                      |
|       | 2 | Female                                    |
|       | 3 | Your choice label here...                 |
| Q53   | 1 | American Indian                           |
|       | 2 | Asian                                     |
|       | 3 | Black or African American                 |
|       | 4 | Native Hawaiian or other Pacific Islander |
|       | 5 | White                                     |
|       | 6 | Other (please specify)                    |
| Q54   | 1 | No                                        |
|       | 2 | Yes                                       |
| Q55_1 | 1 | Freshman/Rising Sophomore                 |
|       | 2 | Sophomore/Rising Junior                   |
|       | 3 | Junior/Rising Senior                      |
|       | 4 | Senior                                    |



|     |    |                                                      |
|-----|----|------------------------------------------------------|
|     | 5  | Other                                                |
| Q57 | 1  | Mother                                               |
|     | 2  | Father                                               |
|     | 3  | Other guardian (please specify)                      |
| Q58 | 1  | No schooling completed                               |
|     | 2  | Some schooling, but less than 6th grade              |
|     | 3  | 6th to 12th grade - no diploma                       |
|     | 4  | Regular high school diploma                          |
|     | 5  | GED or alternate credential                          |
|     | 6  | Some college credit, but less than 1 year of college |
|     | 7  | 1 or more years of college credit, no degree         |
|     | 8  | Associate's degree (e.g., AA, AS)                    |
|     | 9  | Bachelor's degree (e.g., BA, BS)                     |
|     | 10 | Master's degree (e.g., MA, MS, MEng, MEd, MSW, MBA)  |
|     | 11 | Professional degree (e.g., MD, DDS, DVM, LLB, JD)    |
|     | 12 | Doctorate degree (e.g., PhD, EdD)                    |
| Q61 | 1  | Mother                                               |
|     | 2  | Father                                               |
|     | 3  | Other guardian (please specify)                      |
| Q62 | 1  | No schooling completed                               |
|     | 2  | Some schooling, but less than 6th grade              |
|     | 3  | 6th to 12th grade - no diploma                       |
|     | 4  | Regular high school diploma                          |
|     | 5  | GED or alternate credential                          |
|     | 6  | Some college credit, but less than 1 year of college |
|     | 7  | 1 or more years of college credit, no degree         |
|     | 8  | Associate's degree (e.g., AA, AS)                    |
|     | 9  | Bachelor's degree (e.g., BA, BS)                     |
|     | 10 | Master's degree (e.g., MA, MS, MEng, MEd, MSW, MBA)  |
|     | 11 | Professional degree (e.g., MD, DDS, DVM, LLB, JD)    |
|     | 12 | Doctorate degree (e.g., PhD, EdD)                    |
| Q68 | 5  | No                                                   |
|     | 6  | Yes                                                  |

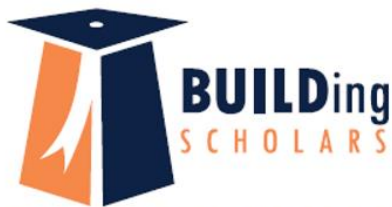

THE UNIVERSITY OF TEXAS AT EL PASO

## Instructions for Judges

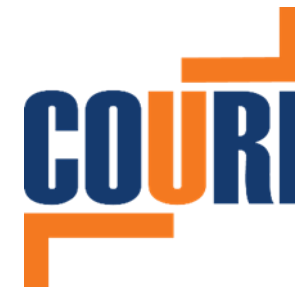

Using the judging app, please score in terms of the student's development as a researcher using the following criteria:

### The poster presentation indicates that the student

|                   |            |                                                                                                     |
|-------------------|------------|-----------------------------------------------------------------------------------------------------|
| Needs improvement | (1 point)  | ... is in the very early stages of development with respect to this learning outcome                |
| Satisfactory      | (2 points) | ... is in the process of achieving this learning outcome                                            |
| Very good         | (3 points) | ... has almost mastered this learning outcome but still has <b>minor</b> flaws or is lacking polish |
| Outstanding       | (4 points) | ... has mastered this learning outcome without any flaws                                            |

| Learning Outcome                                                                                          | Indicators (as shown in judging app)                                                                                                                                                                                                                                                                                                                                                    |
|-----------------------------------------------------------------------------------------------------------|-----------------------------------------------------------------------------------------------------------------------------------------------------------------------------------------------------------------------------------------------------------------------------------------------------------------------------------------------------------------------------------------|
| <b>Identify and utilize relevant previous work that supports the research, scholarly or creative work</b> | <ol style="list-style-type: none"> <li>1. Presenter provides sufficient background information to place the project in appropriate scholarly context</li> <li>2. Presenter effectively communicates the significance of the project and contribution to the field or society</li> </ol>                                                                                                 |
| <b>Articulate a timely or important research question or creative objective</b>                           | <ol style="list-style-type: none"> <li>3. Presenter clearly articulates the research question or creative objective.</li> <li>4. The research question or creative objective follows logically from the previous work cited</li> </ol>                                                                                                                                                  |
| <b>Identify and utilize appropriate methods to address the research question or creative objective</b>    | <ol style="list-style-type: none"> <li>5. Presenter clearly explains the methods and links methods to the project objective.</li> <li>6. Presenter effectively communicates the project progress and results, and interprets results with respect to the research question or creative objective.</li> </ol>                                                                            |
| <b>Present the research effectively in a conference setting</b>                                           | <ol style="list-style-type: none"> <li>7. Presentation materials, performance or visuals are relevant and of professional quality</li> <li>8. Presentation is structured, organized and flows logically.</li> <li>9. Presenter has command of the topic and can easily answer questions.</li> <li>10. Presenter is clear, enthusiastic, and effectively engages the audience</li> </ol> |

## Instructions for Judges (cont.)

**Please visit the ASSIGNED POSTERS**

*If you have a conflict of interest (personal or professional relationship with poster presenter) please select an alternate poster to evaluate*

**Critically evaluate each poster presentation according to the rating scale and the indicators listed.**

**The results will be used for program evaluation.**

*Anonymized and aggregated scores and comments may be shared with the student and faculty mentor.*

*You may complete as many evaluations as you choose within the time frame of the poster session(s).*

***Thank you for your support of Undergraduate Research and BUILDing SCHOLARS***

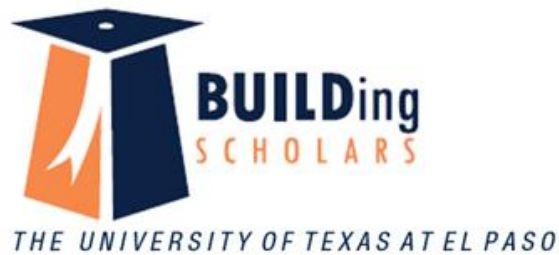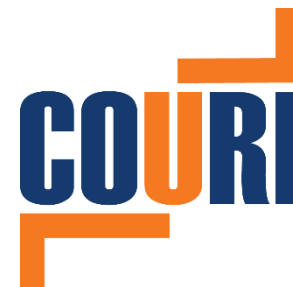

Supplement: combinedsupmats.pdf [file combinedsupmats.pdf]
